# Supplementary material for: CK2 Inhibition and Antitumor Activity of 4,7-Dihydro-6-nitroazolo[1,5-a]pyrimidines
Source: MDPI journal article supplement (doi:10.3390/molecules27165239), 2022-08-17

Supporting Information

for

**CK2 inhibition and antitumor activity of 4,7-dihydro-6-nitroazolo[1,5-a]  
pyrimidines**

Daniil N. Lyapustin<sup>1</sup>, Svetlana K. Kotovskaya<sup>1</sup>, Ilya I. Butorin<sup>1</sup>, Evgeny N. Ulomsky<sup>1</sup>, Vladimir L. Rusinov<sup>1</sup>, Denis A. Babkov<sup>2</sup>, Alexander A. Pokhlebin<sup>2</sup>, Alexander A. Spasov<sup>2</sup>, Vsevolod V. Melekhin<sup>1,3</sup>, Maria D. Tokhtueva<sup>1</sup>, Anna V. Shcheglova<sup>1,3</sup> and Oleg G. Makeev<sup>3</sup>

<sup>1</sup>Ural Federal University named after the first President of Russia B.N. Eltsyn, Mira 19 st, 620002, Ekaterinburg, Russia

<sup>2</sup>Volgograd State Medicinal University, Pavshikh Bortsov 1 Sq, 400131, Volgograd, Russia

<sup>3</sup>Ural State Medical University, Repina 3 st, 620028, Ekaterinburg, Russia

E-mail: v.l.rusinov@urfu.ru

Table of Contents:

NMR Spectra of Compounds **4,5**

S-2

# $^1\text{H}$ , $^{13}\text{C}$ NMR spectra of the products 5,6

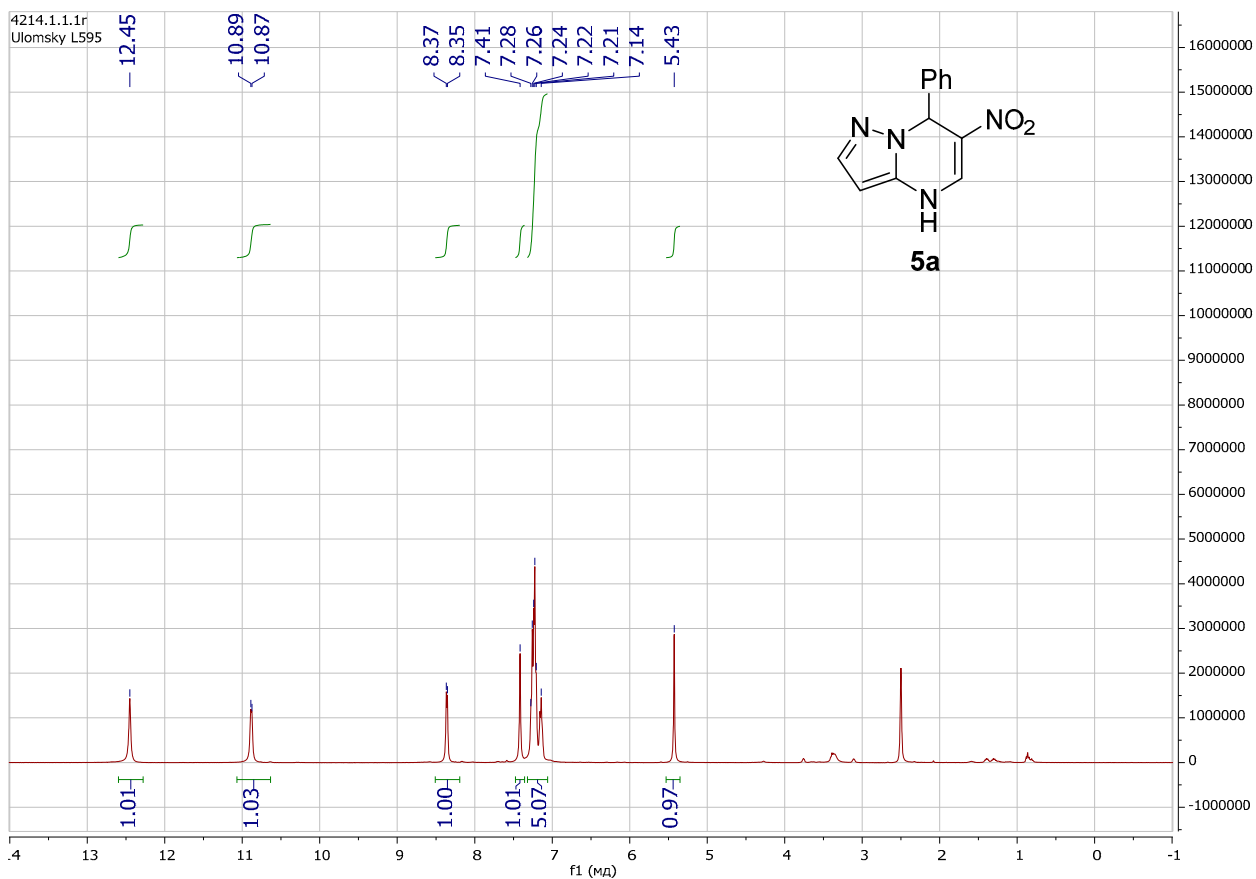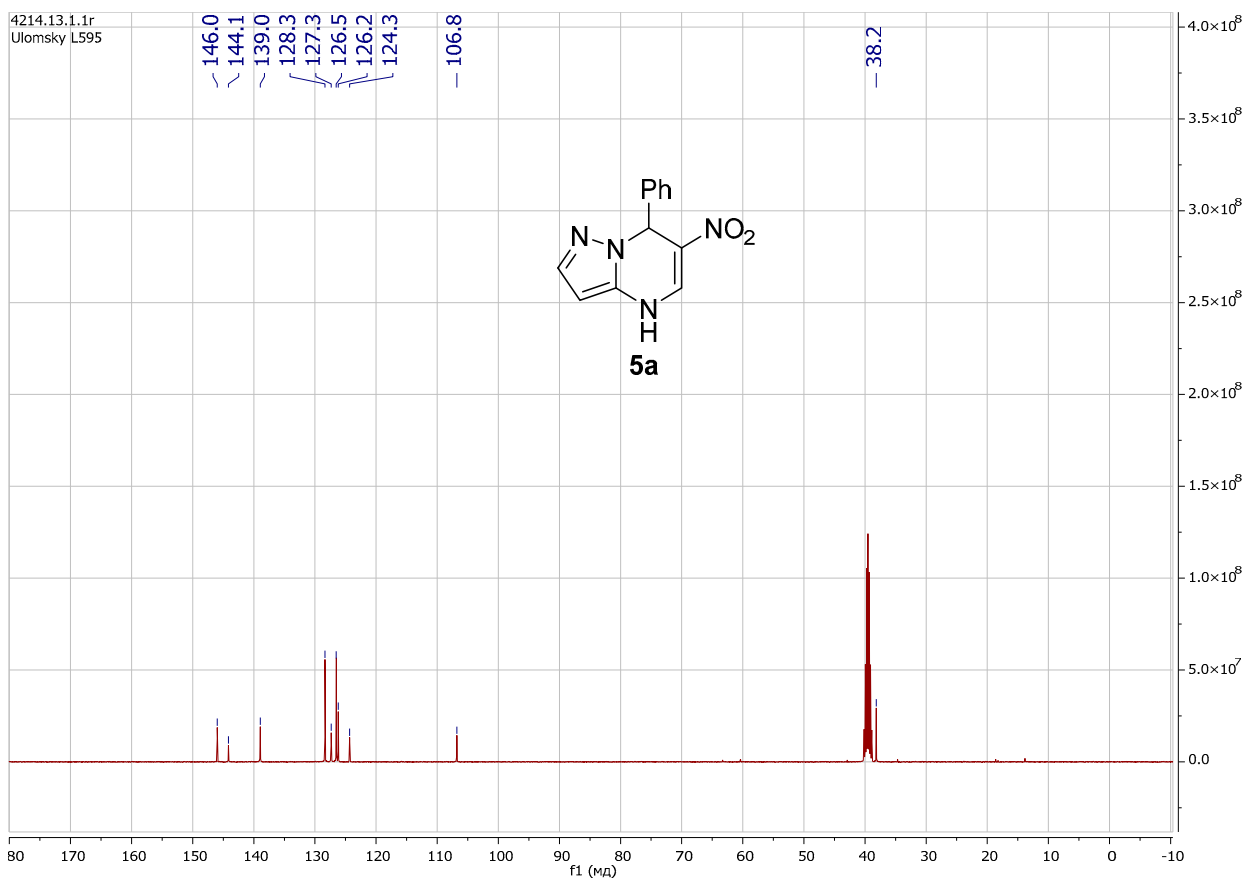

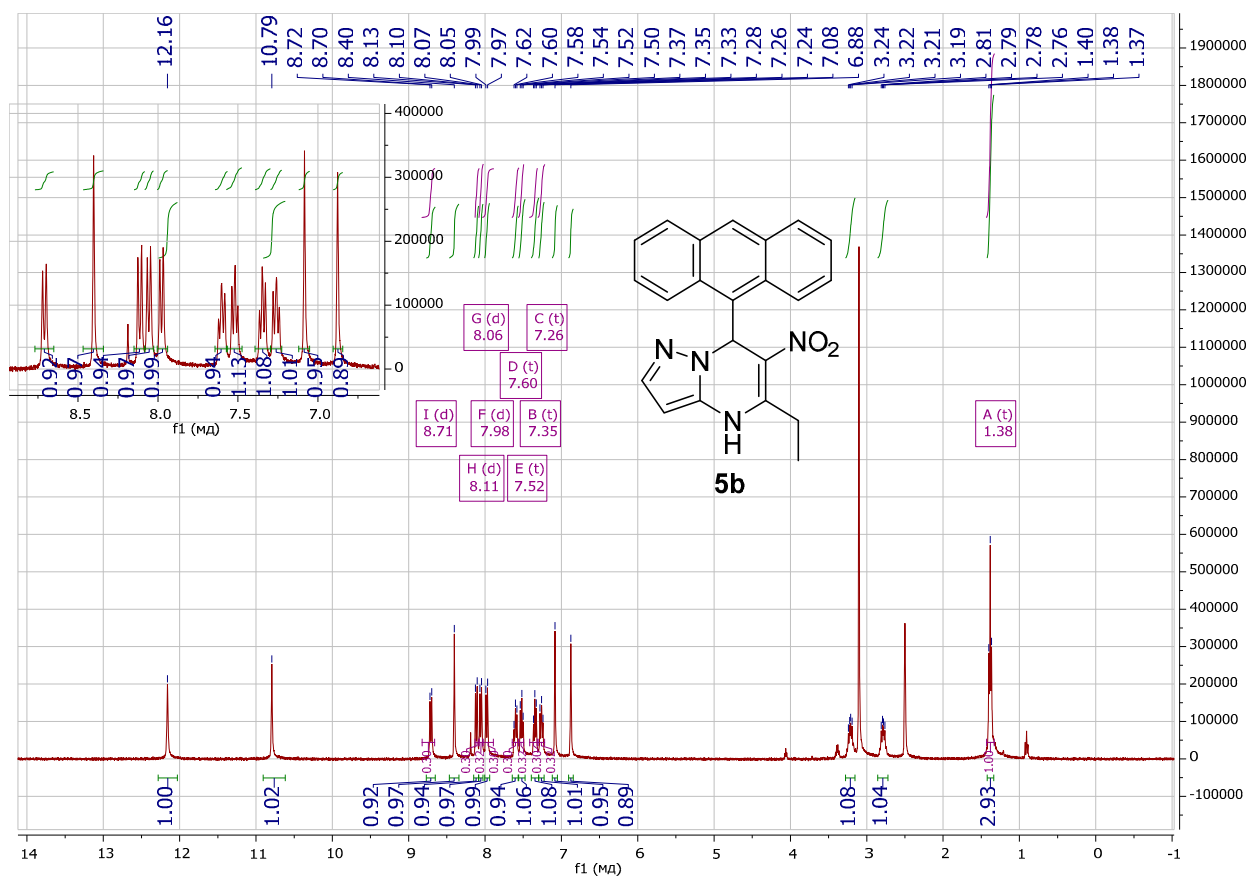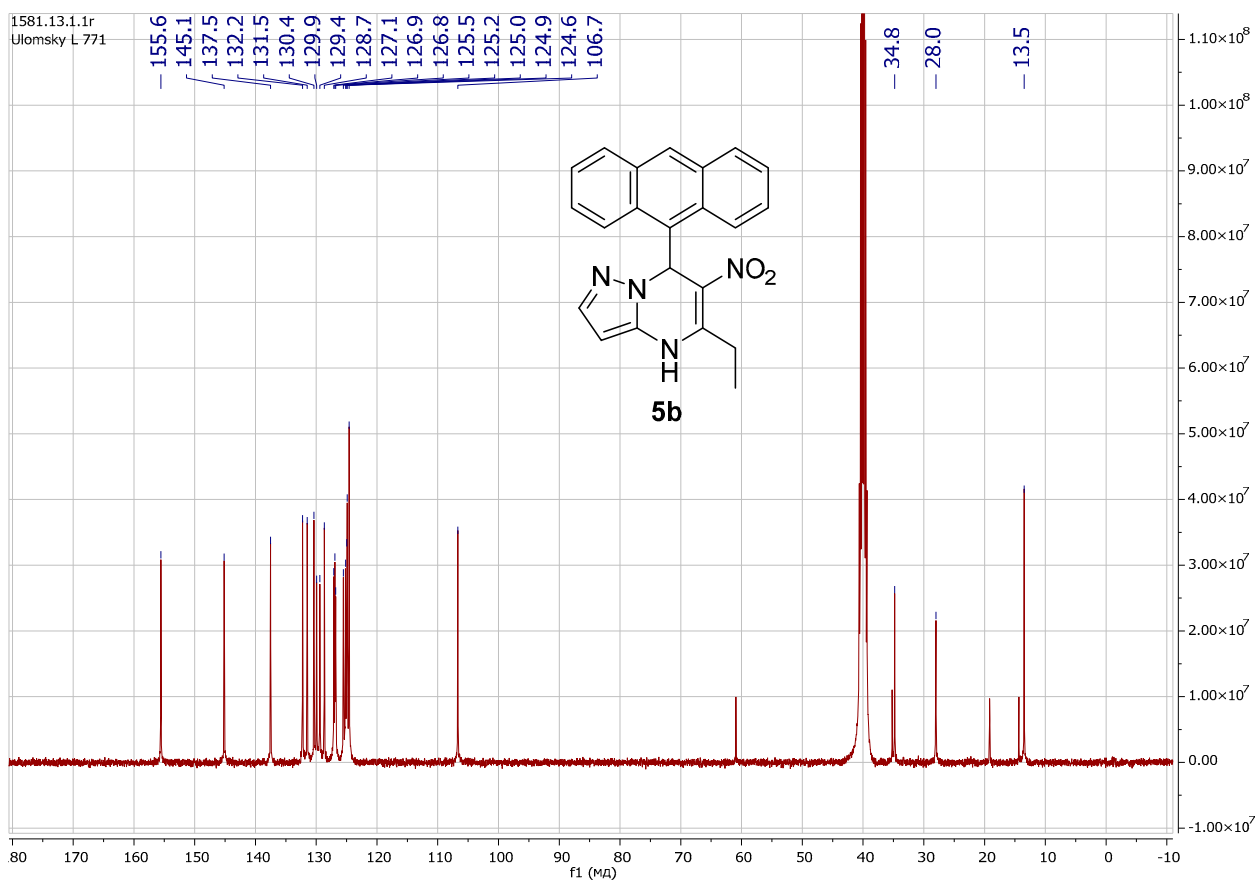

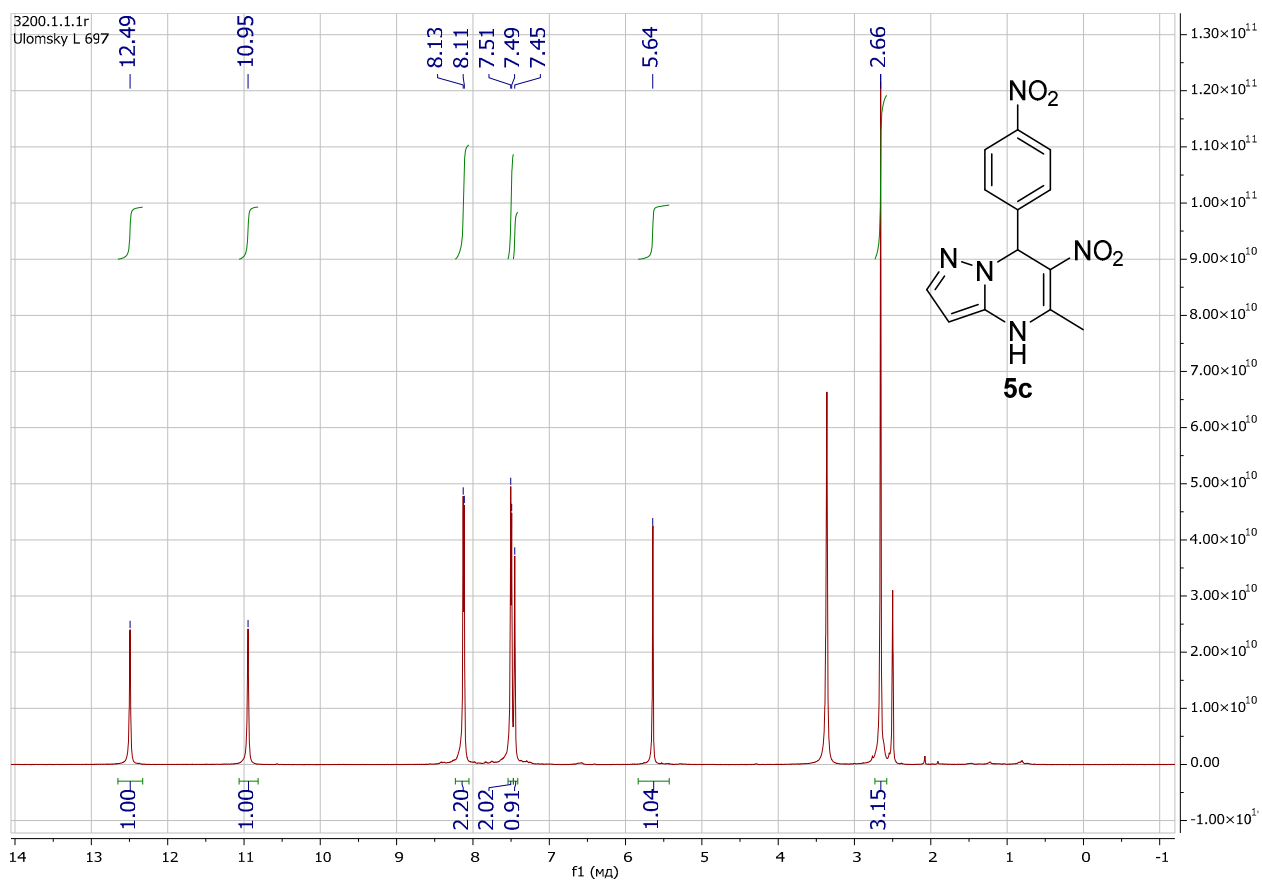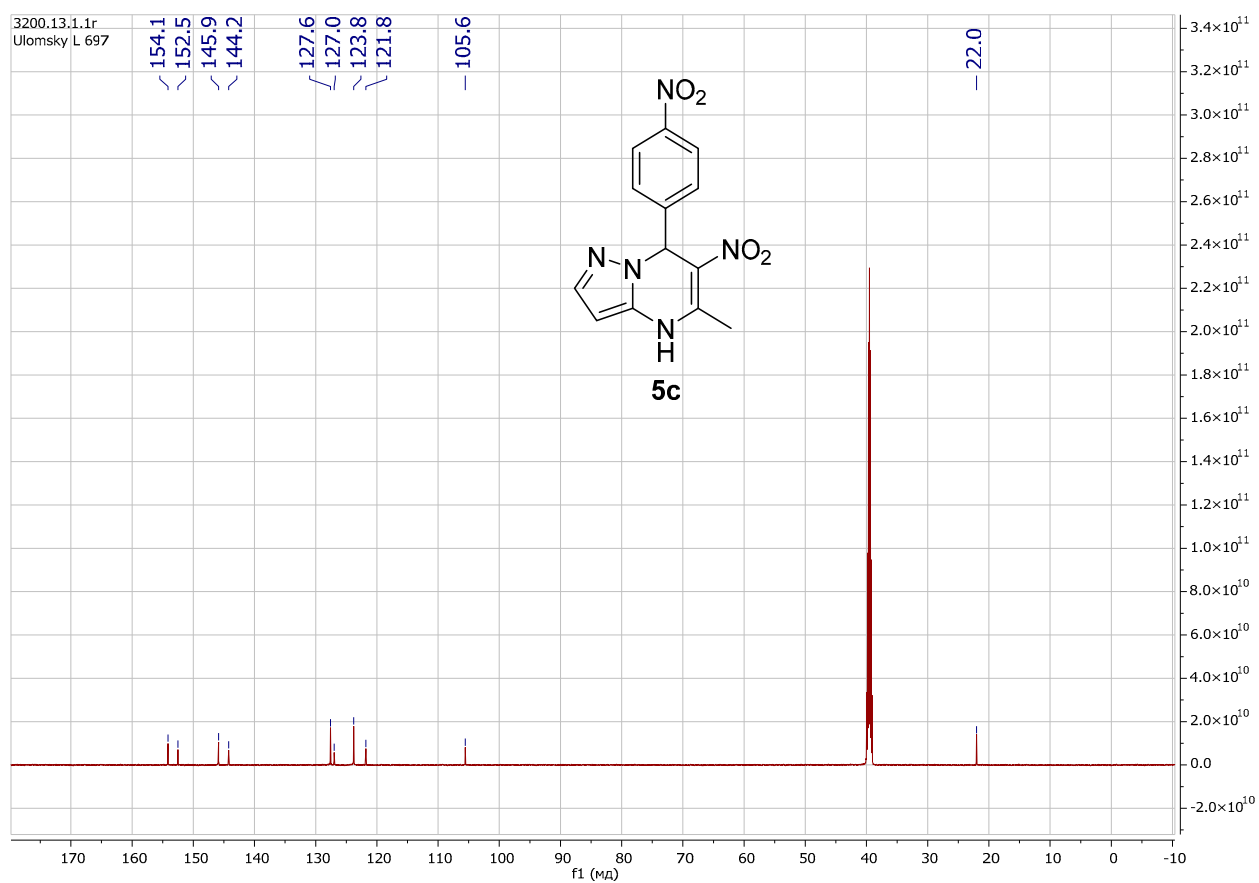

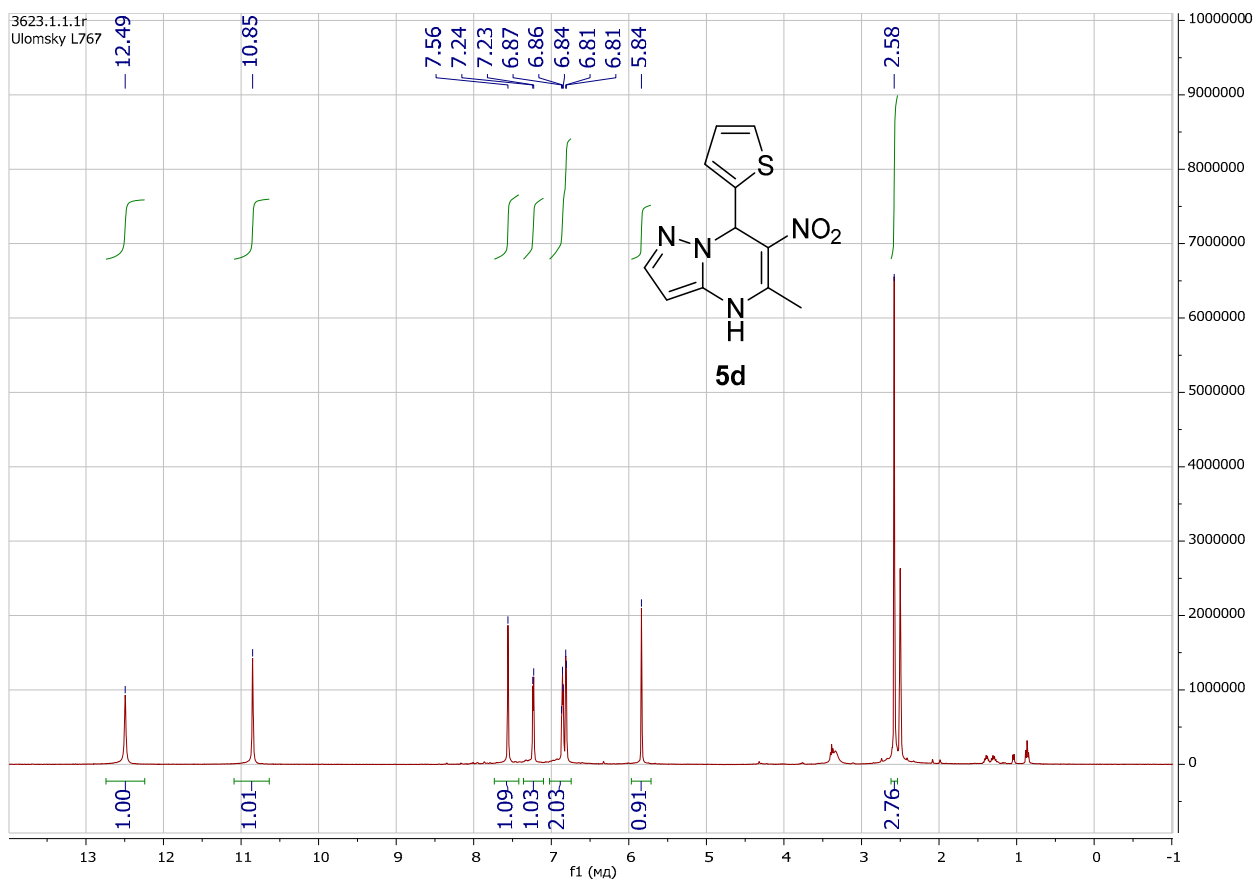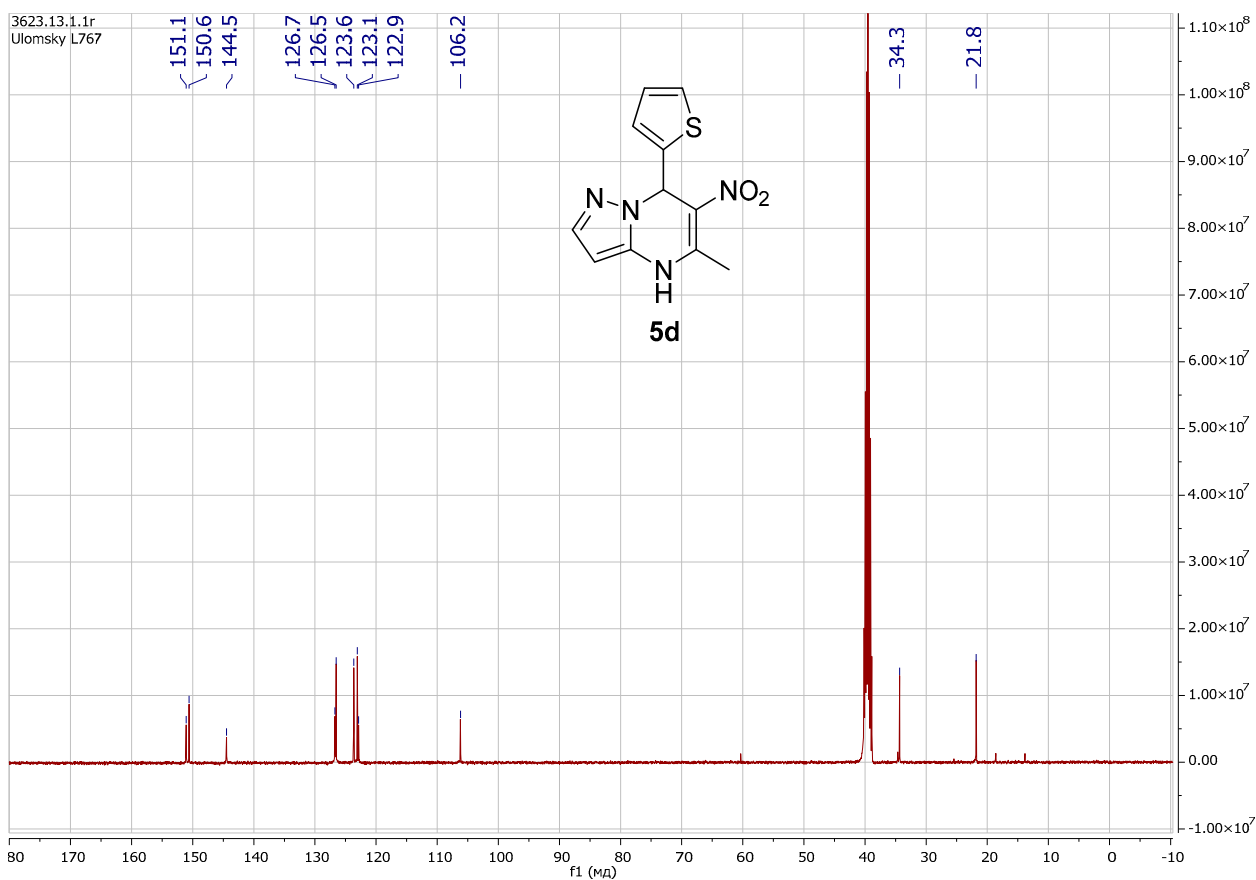

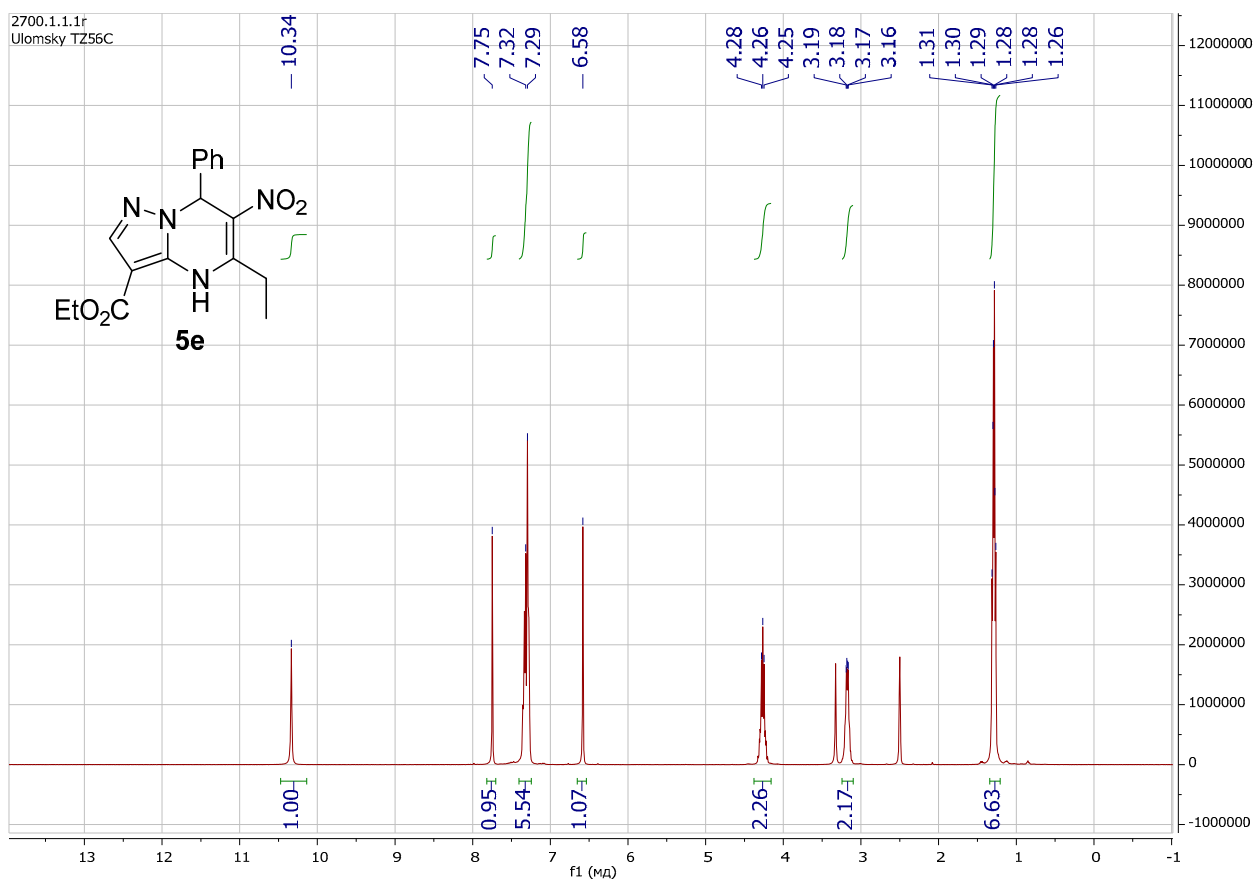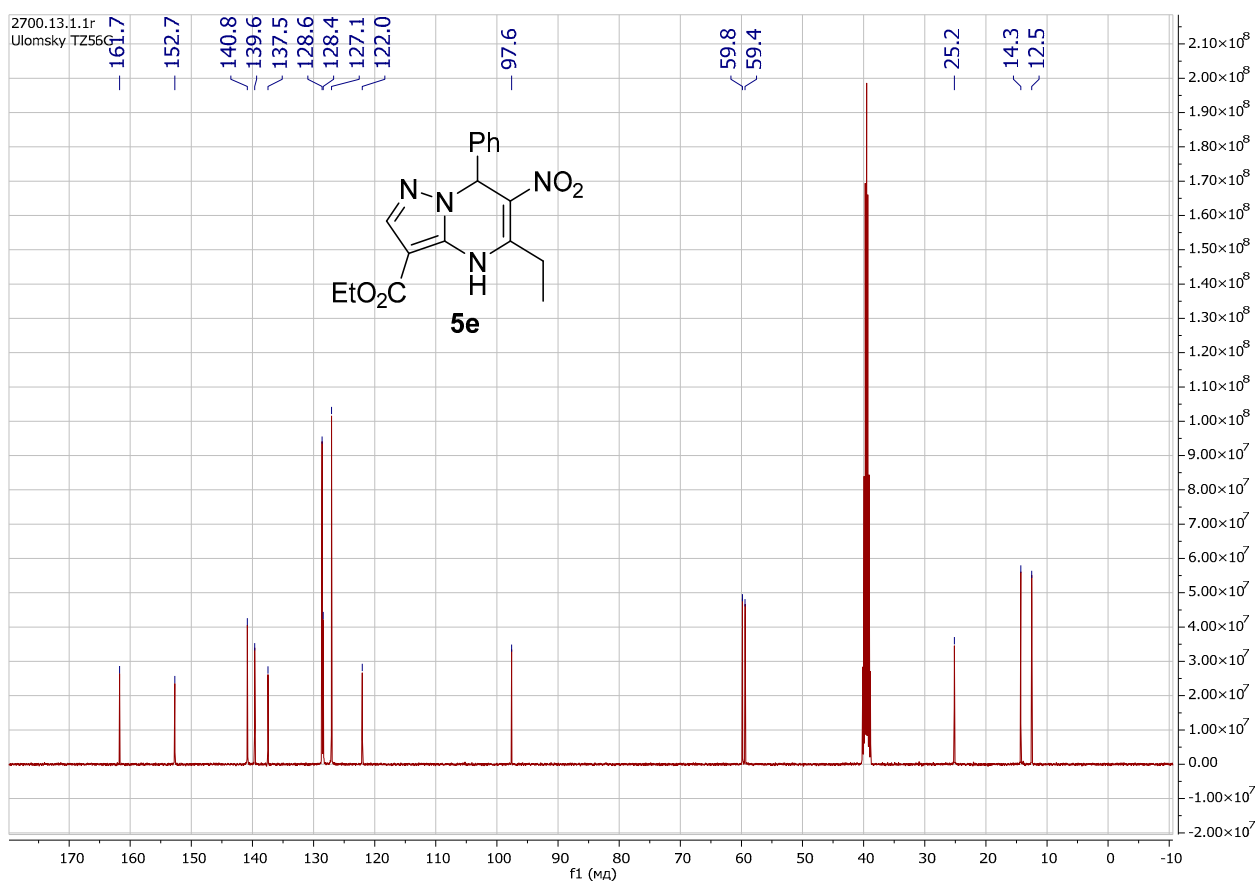

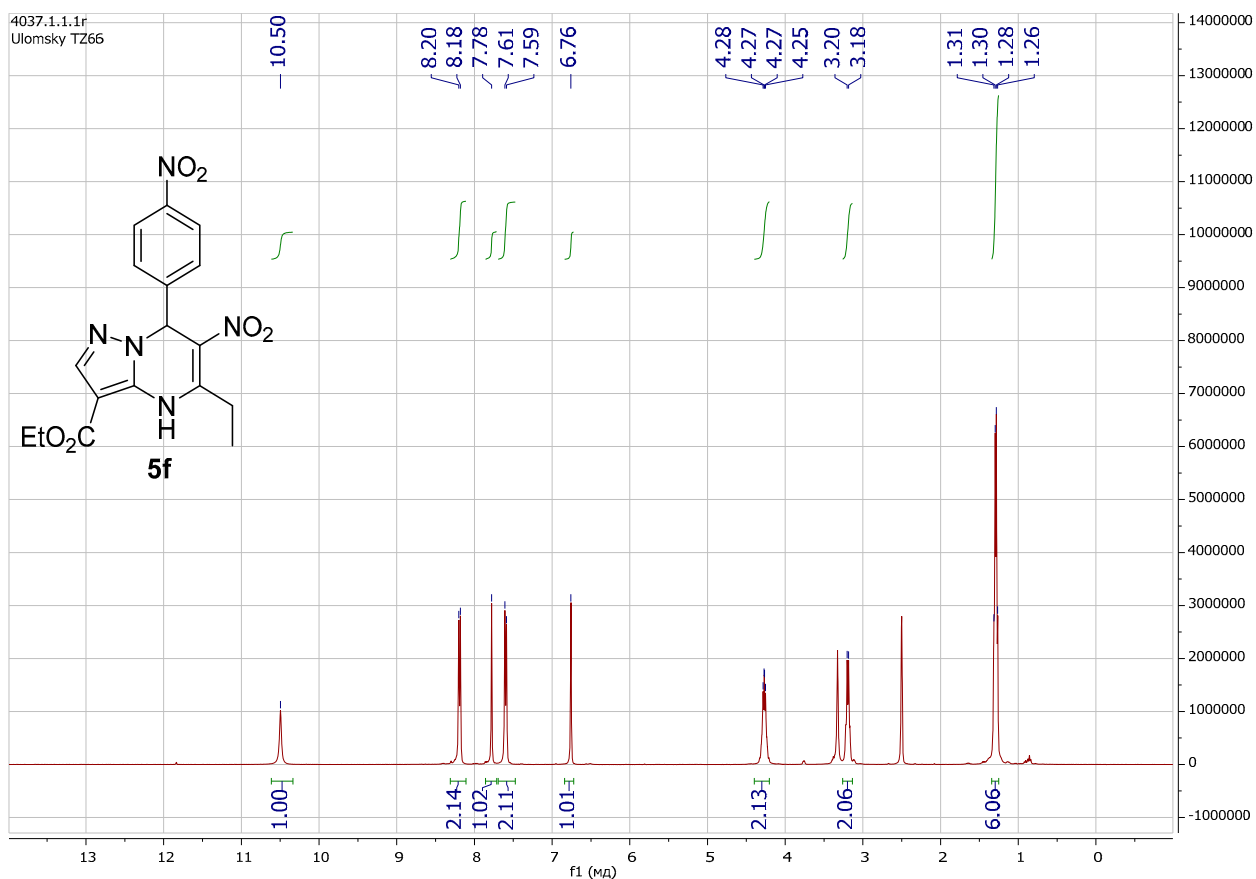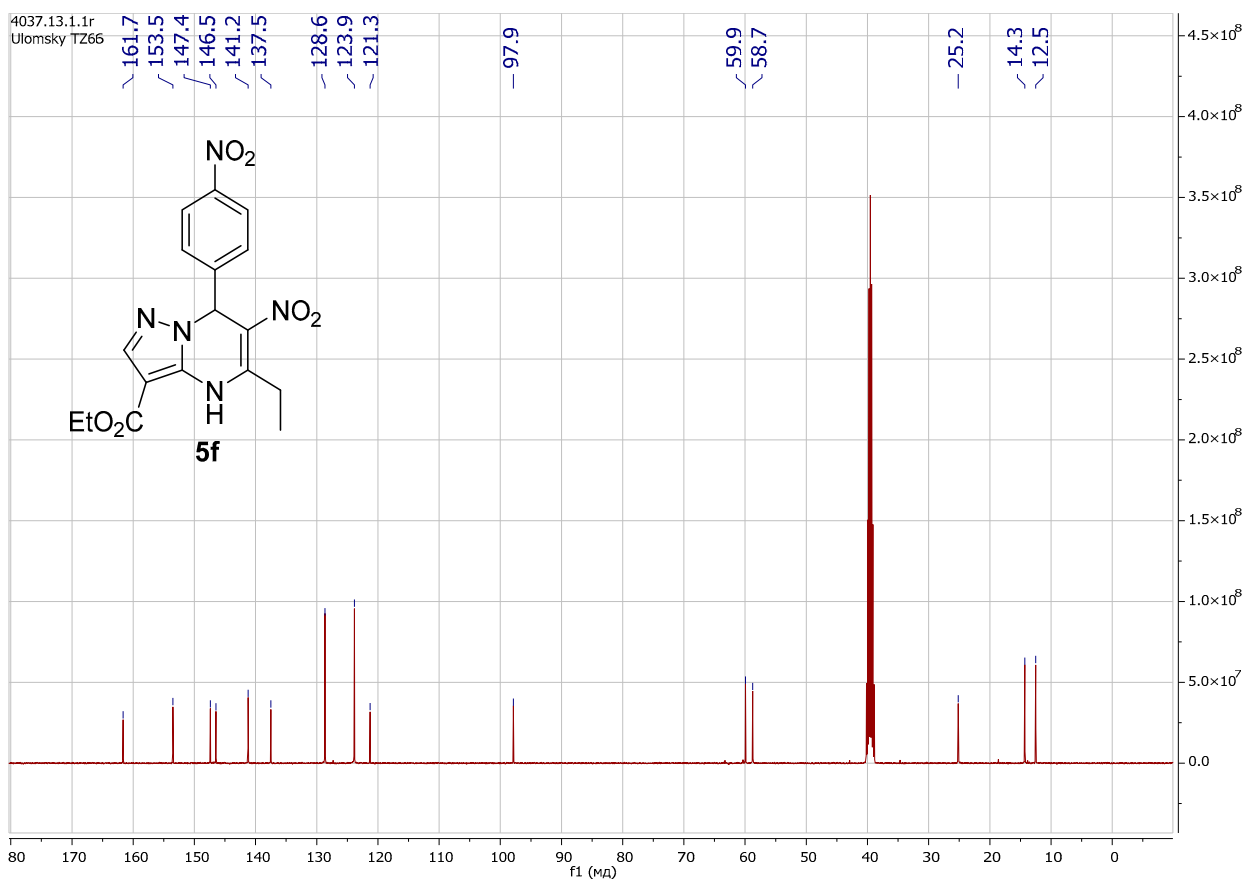

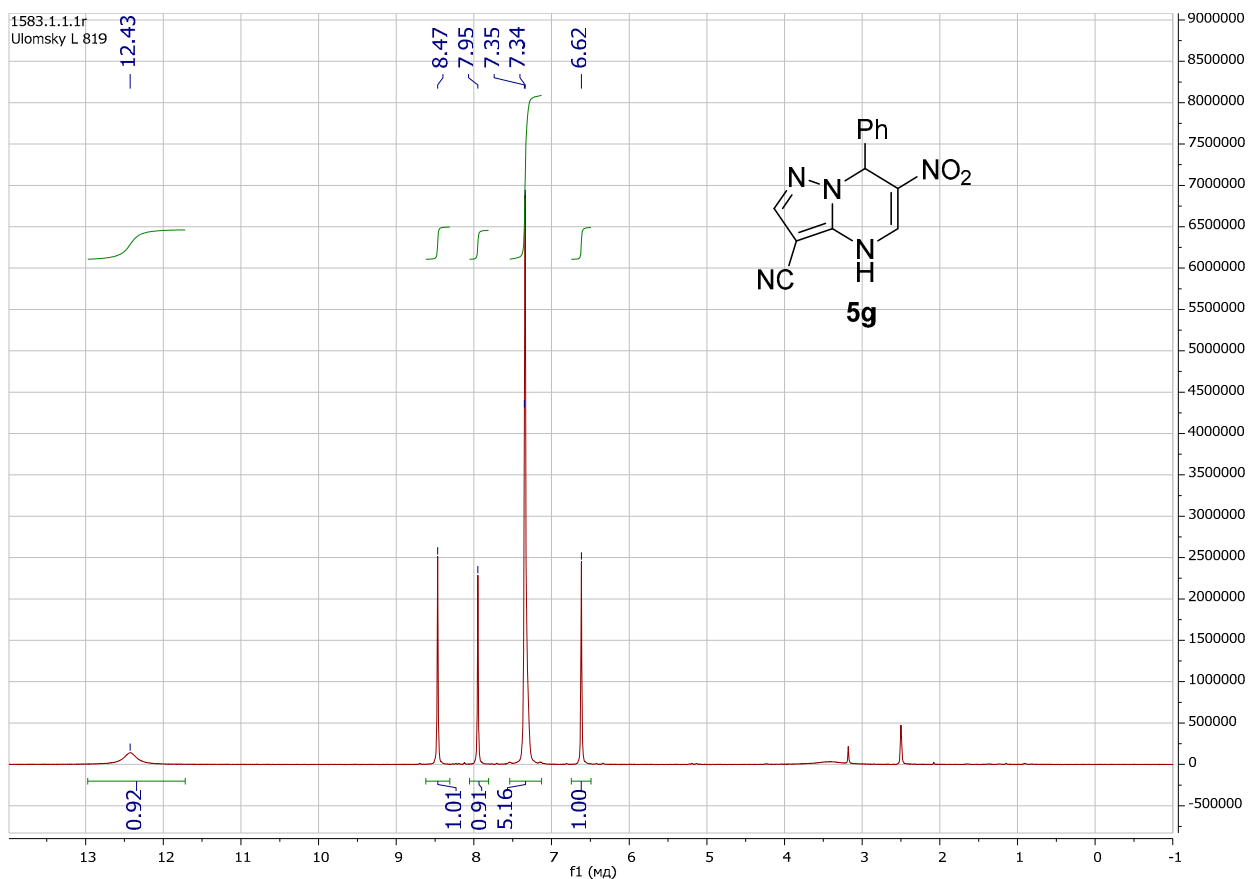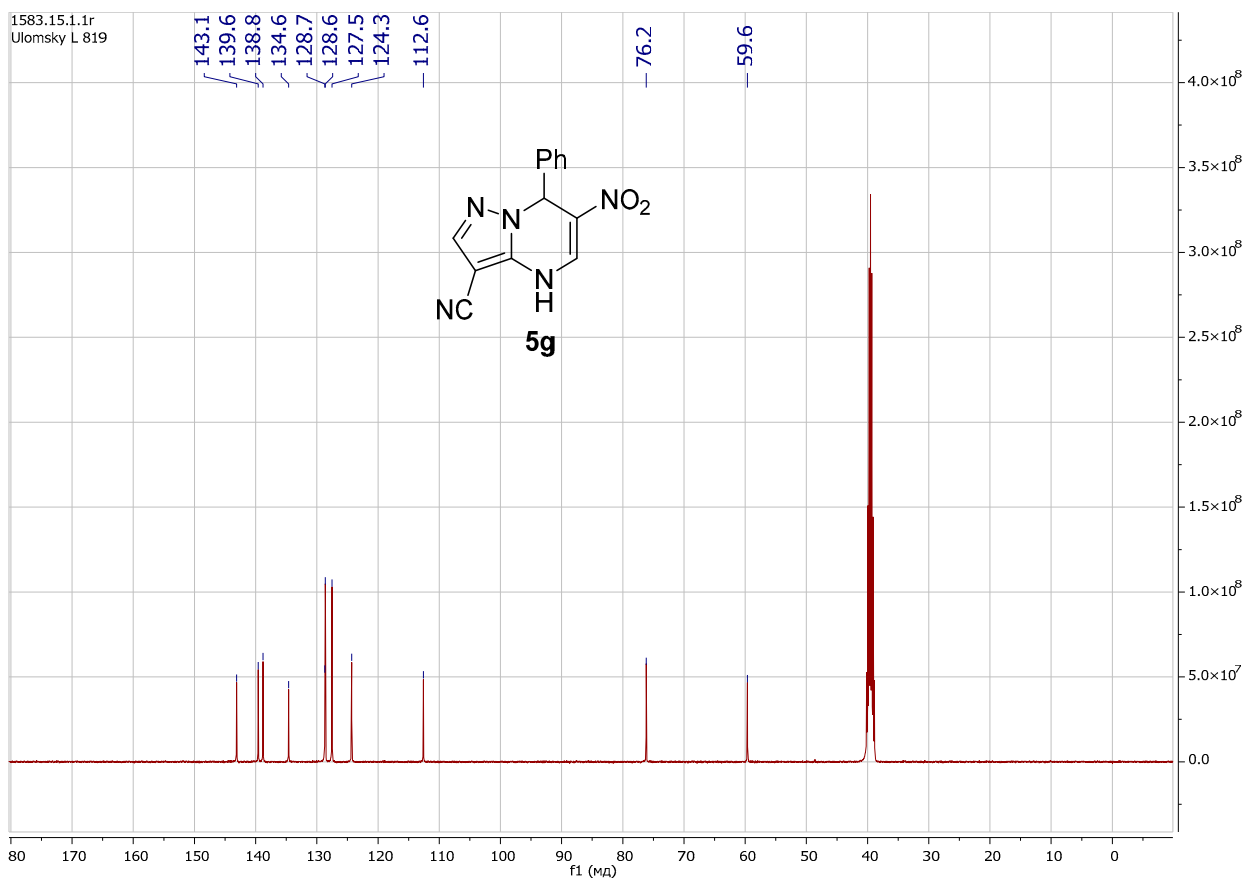



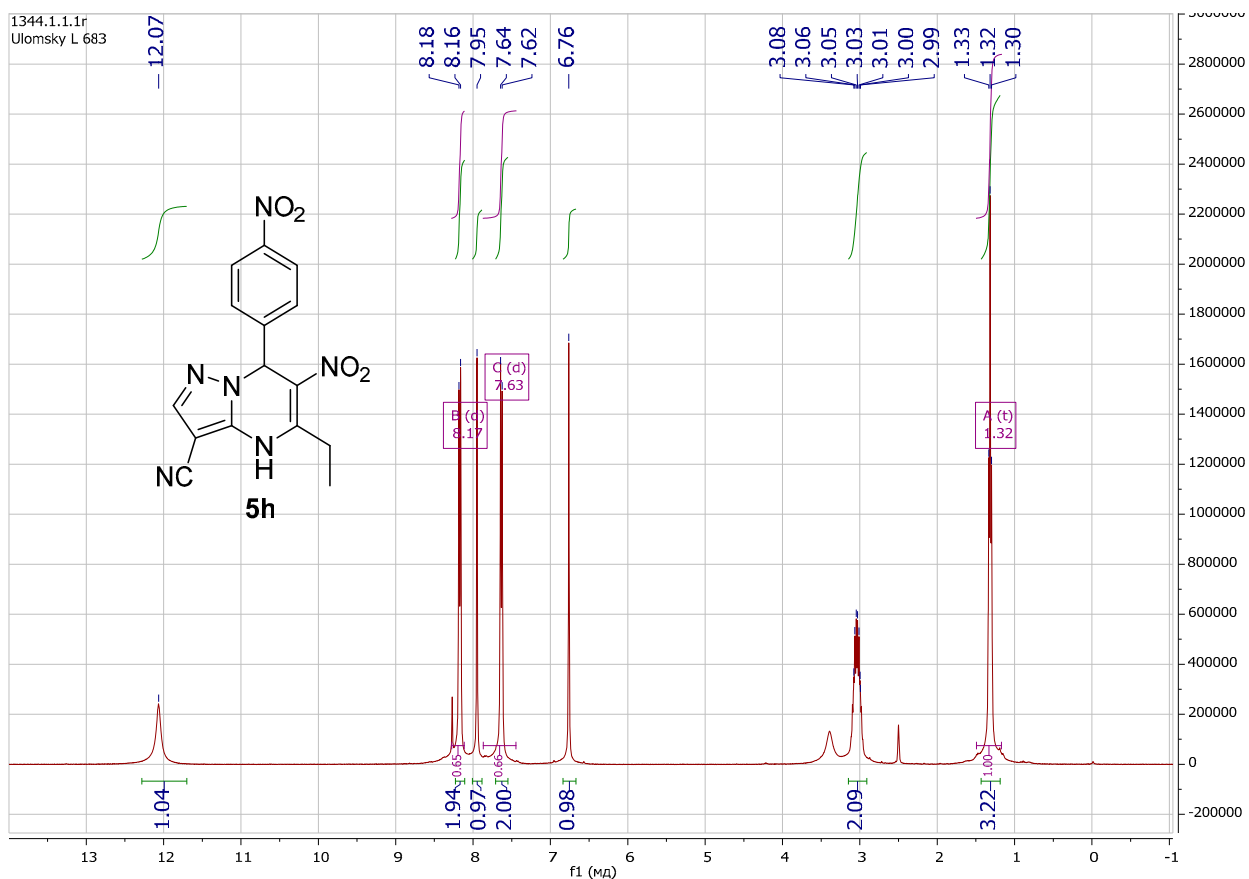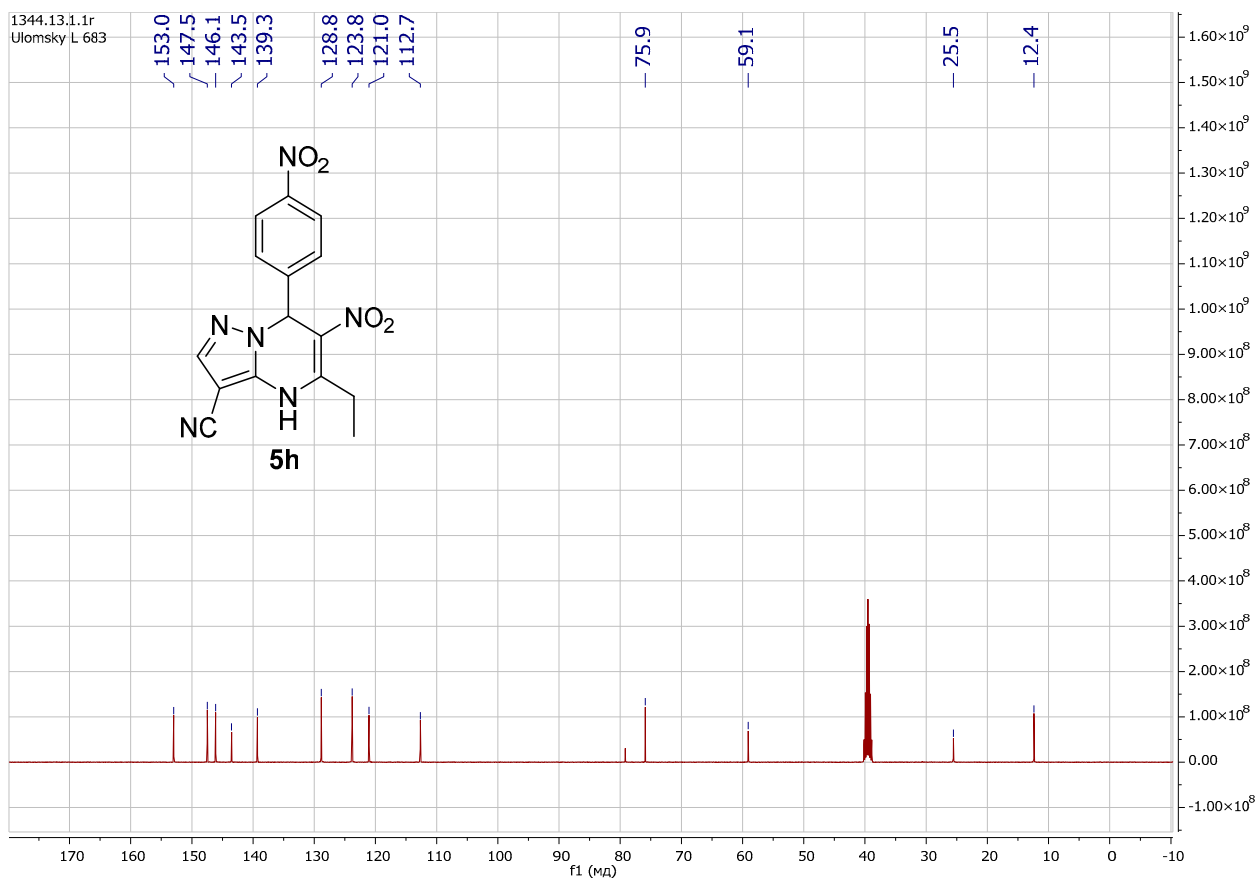

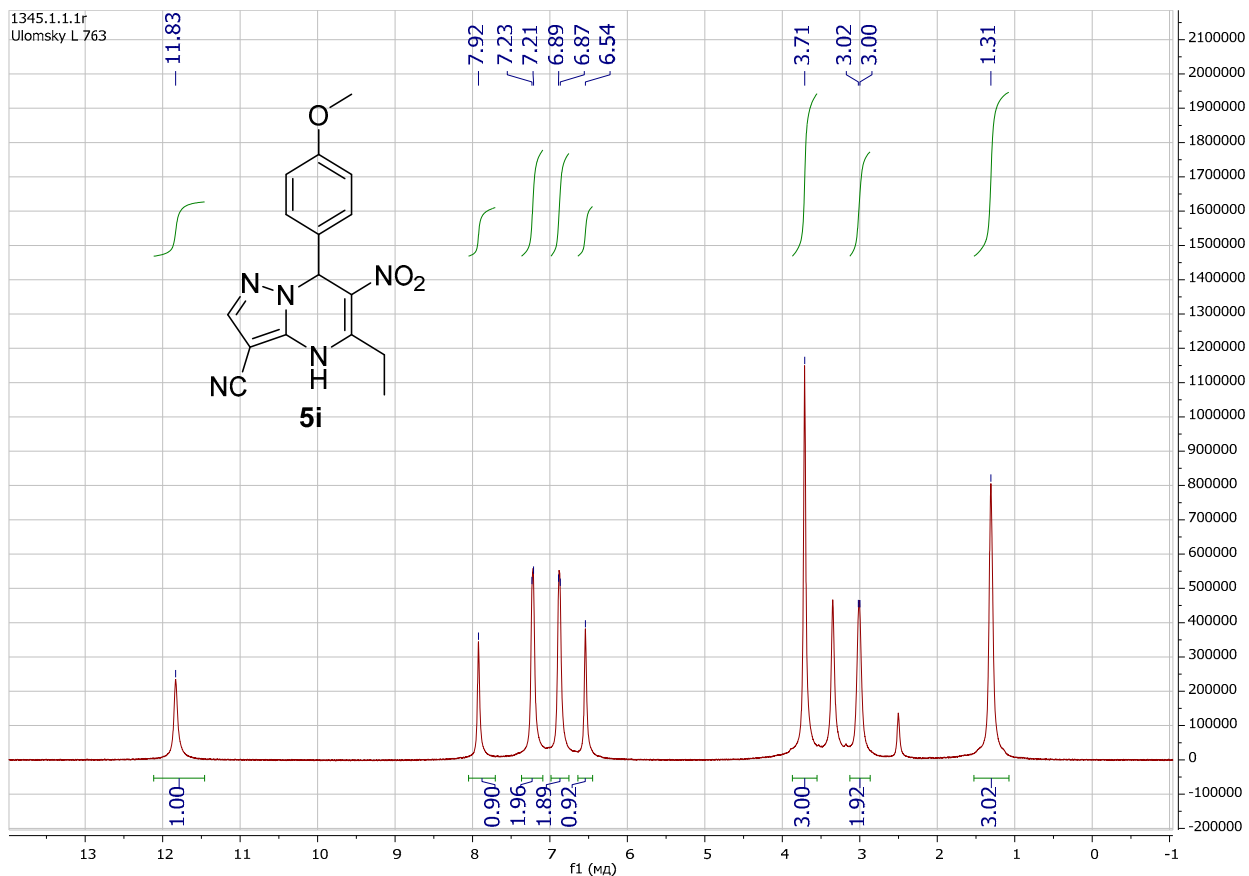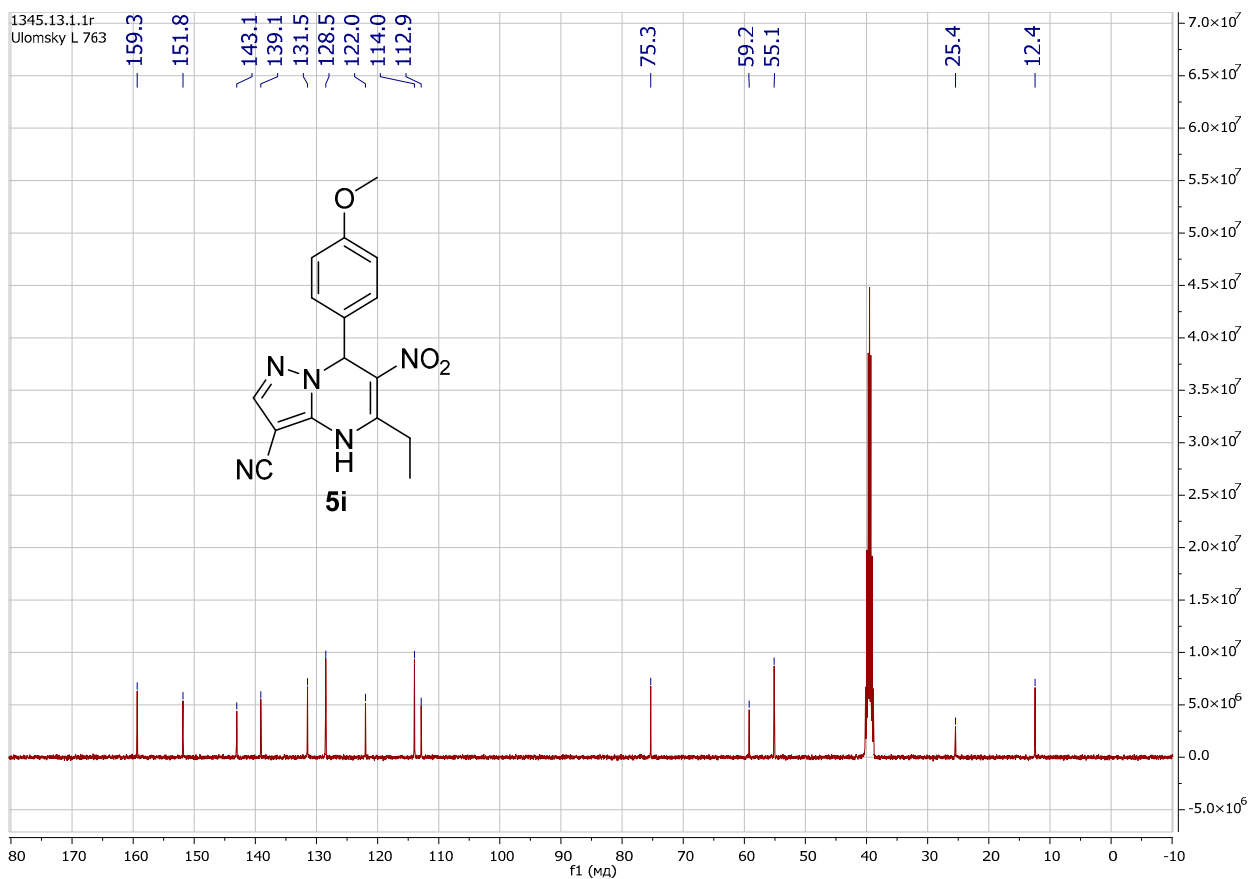

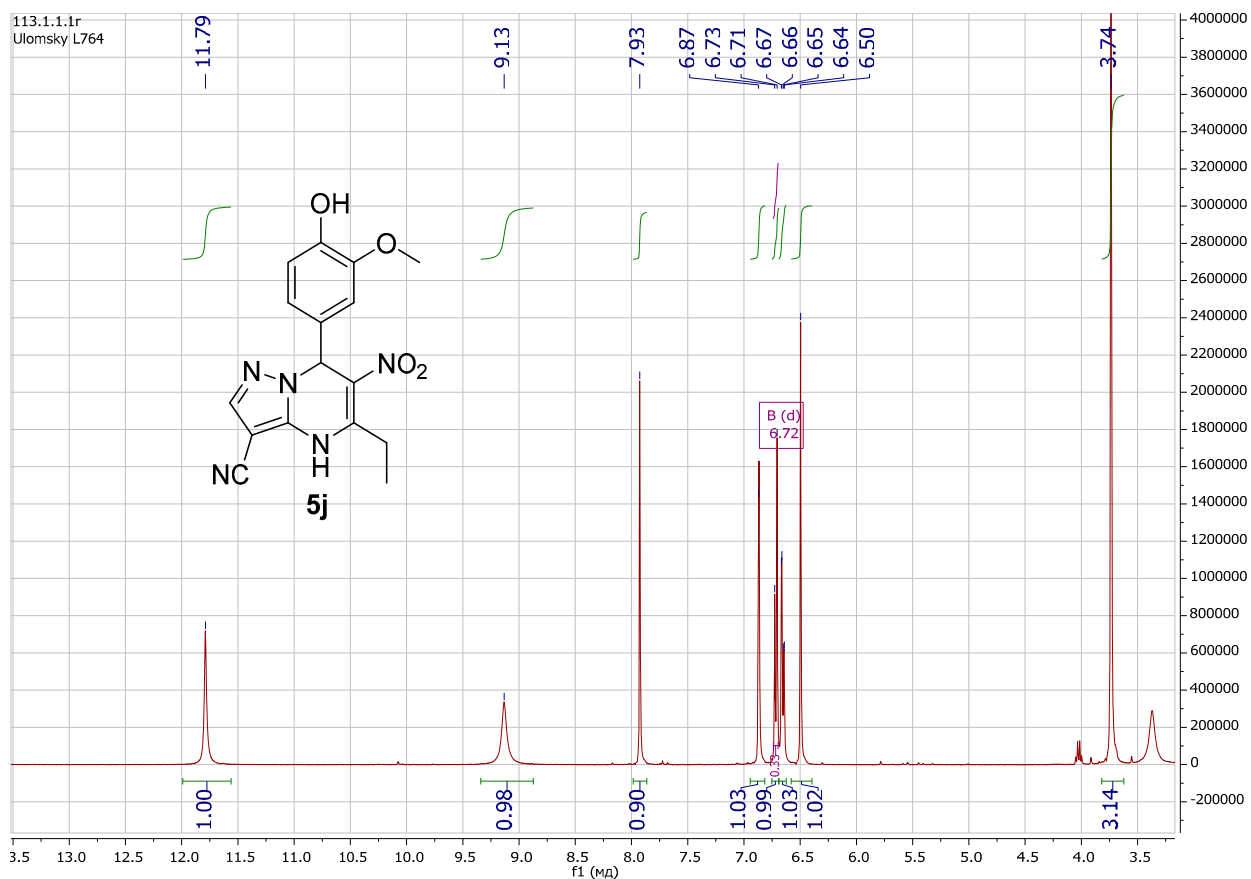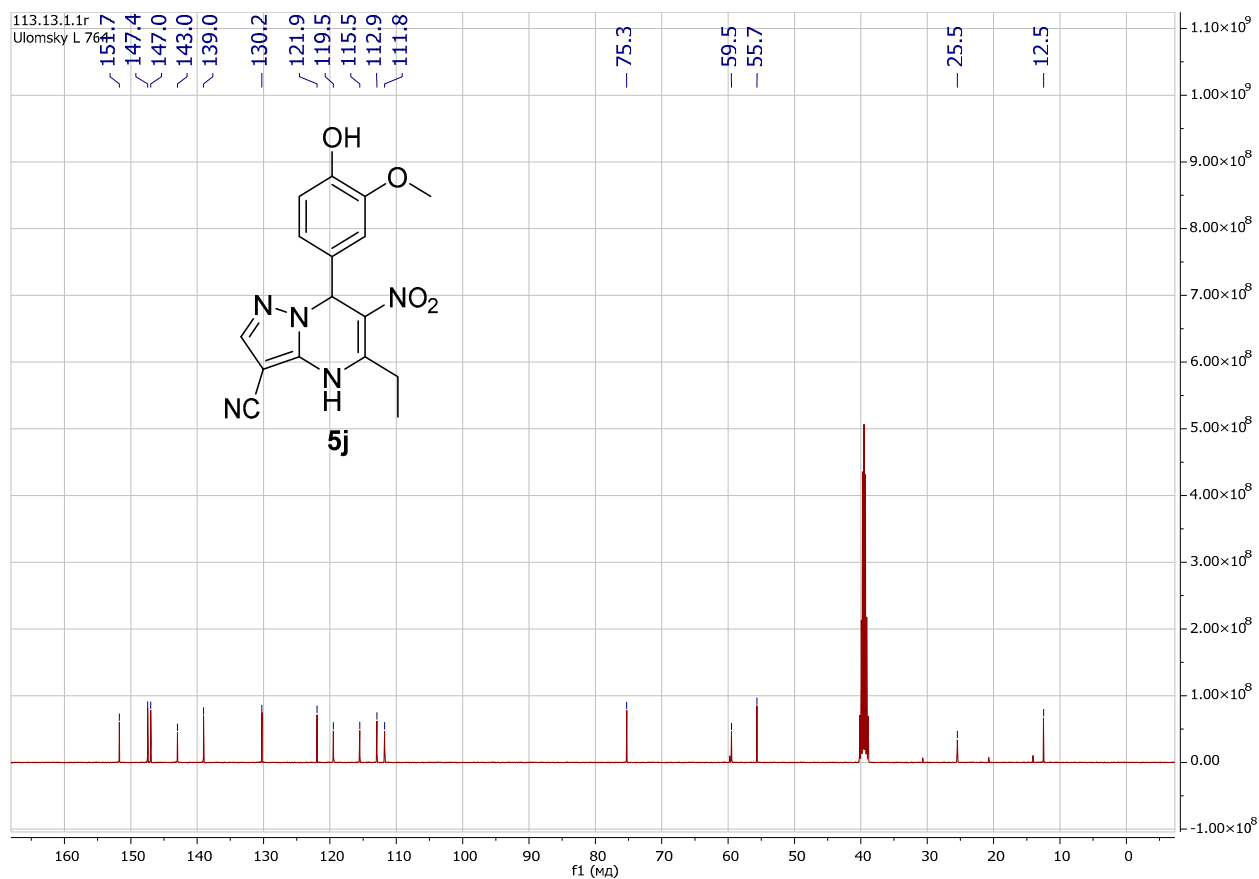

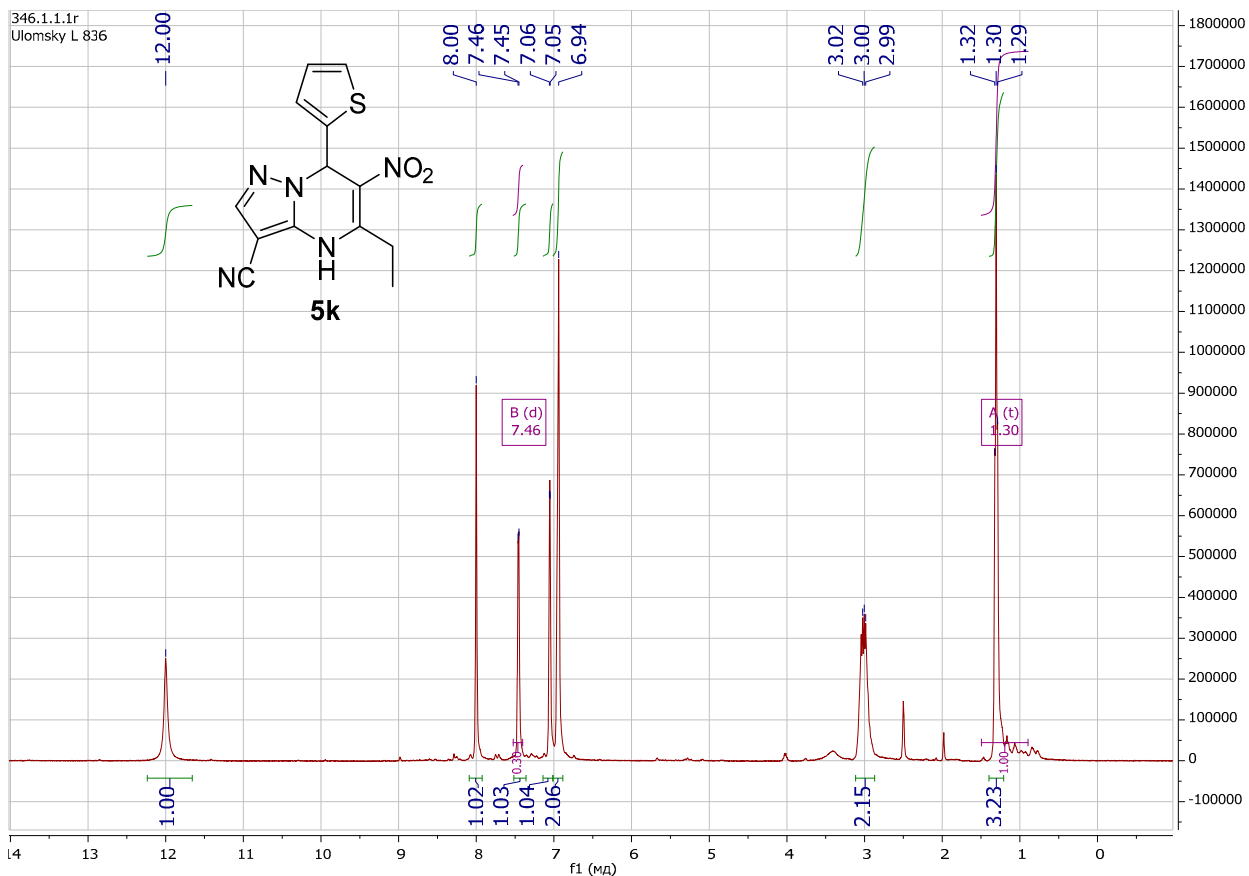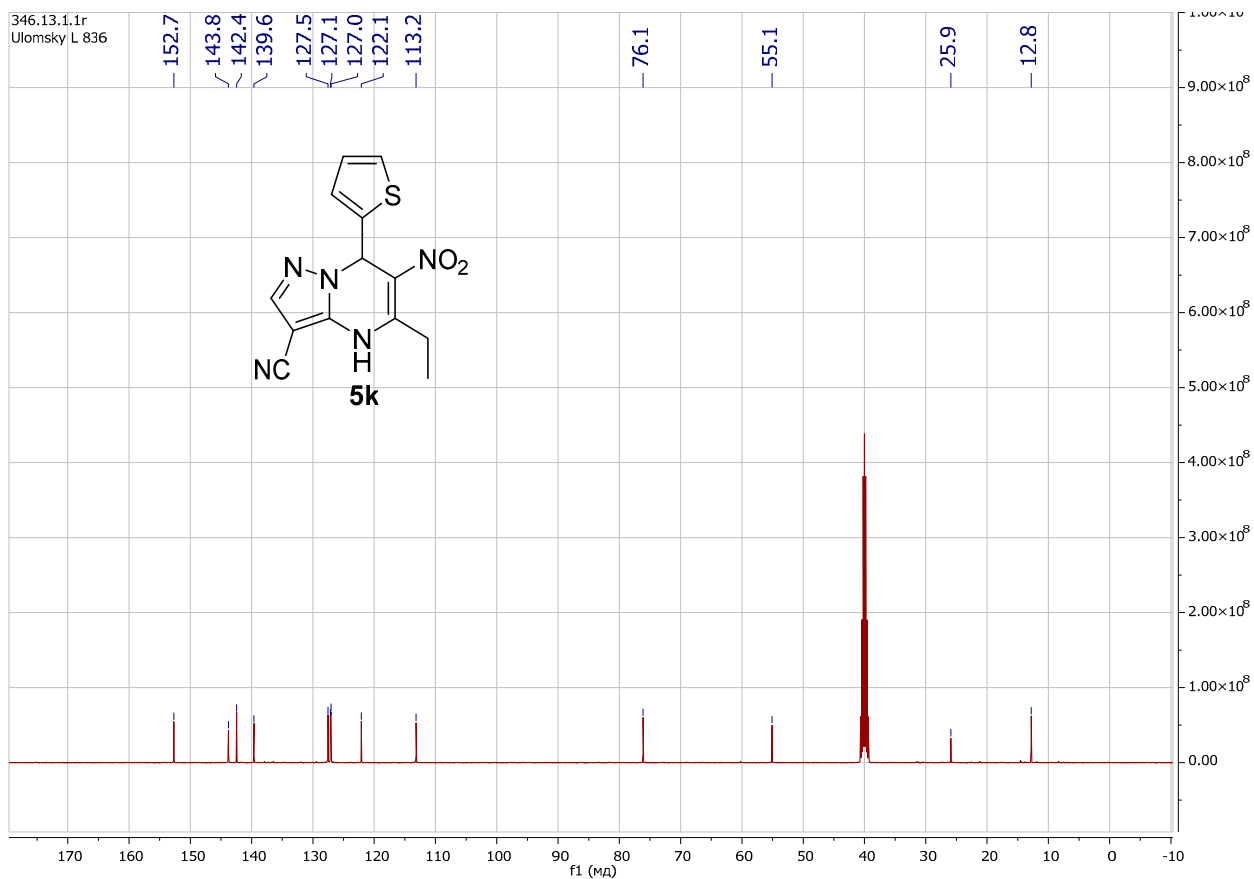

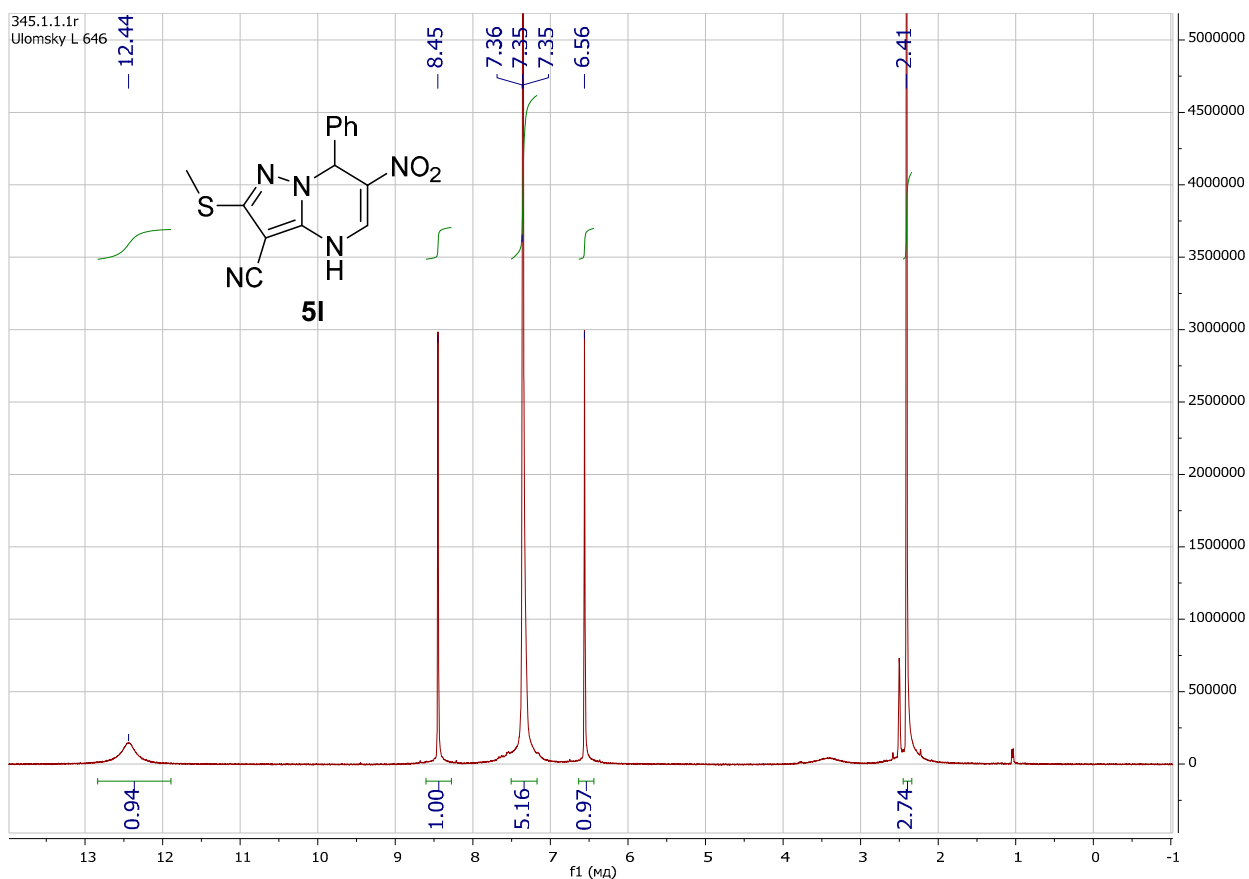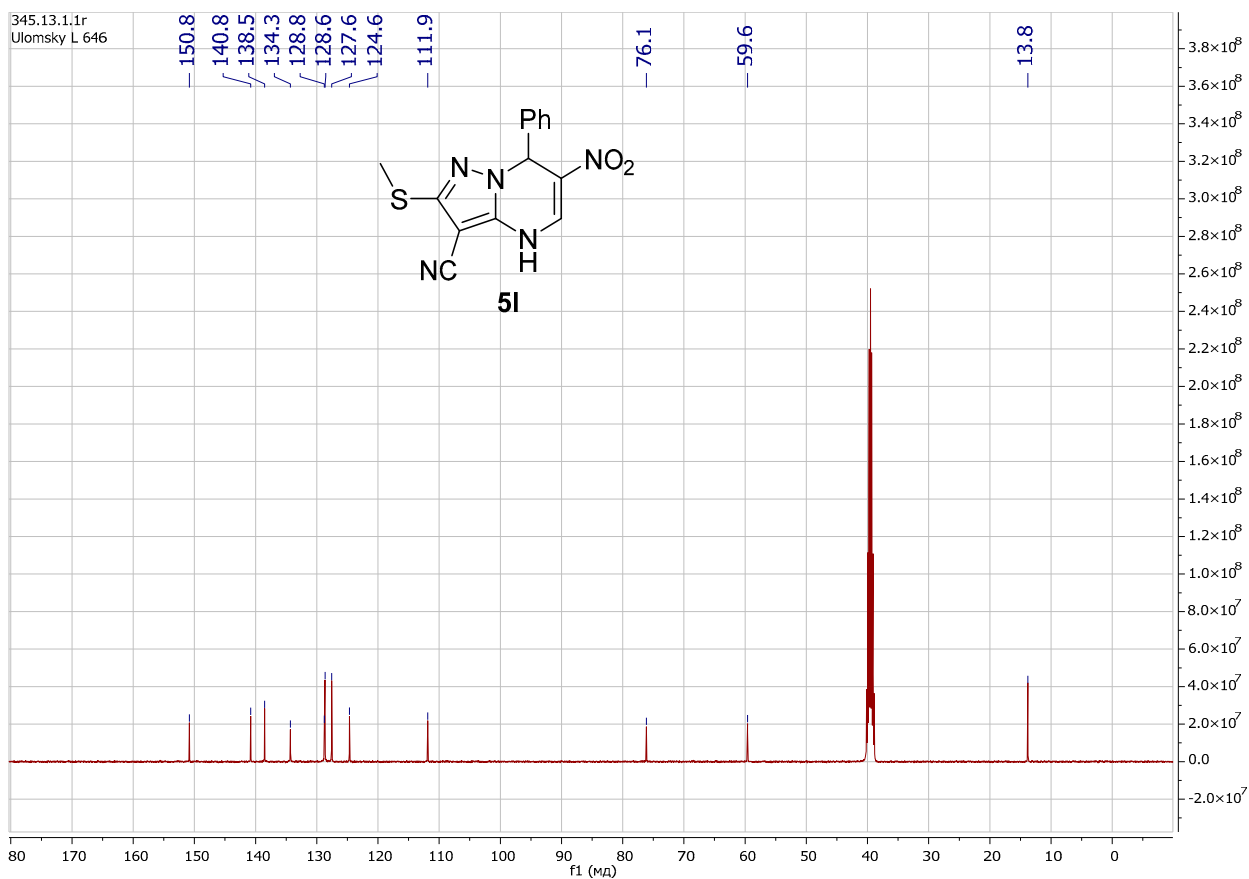

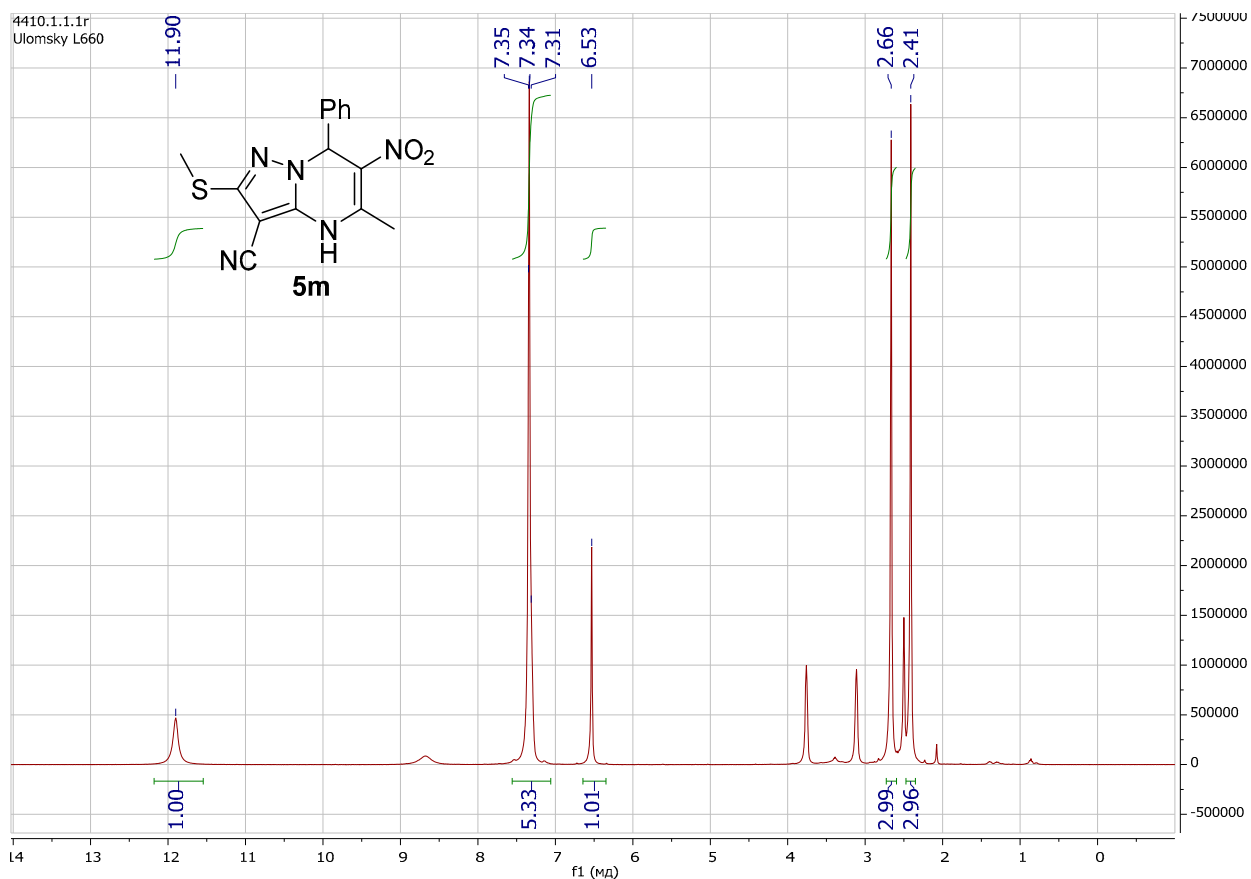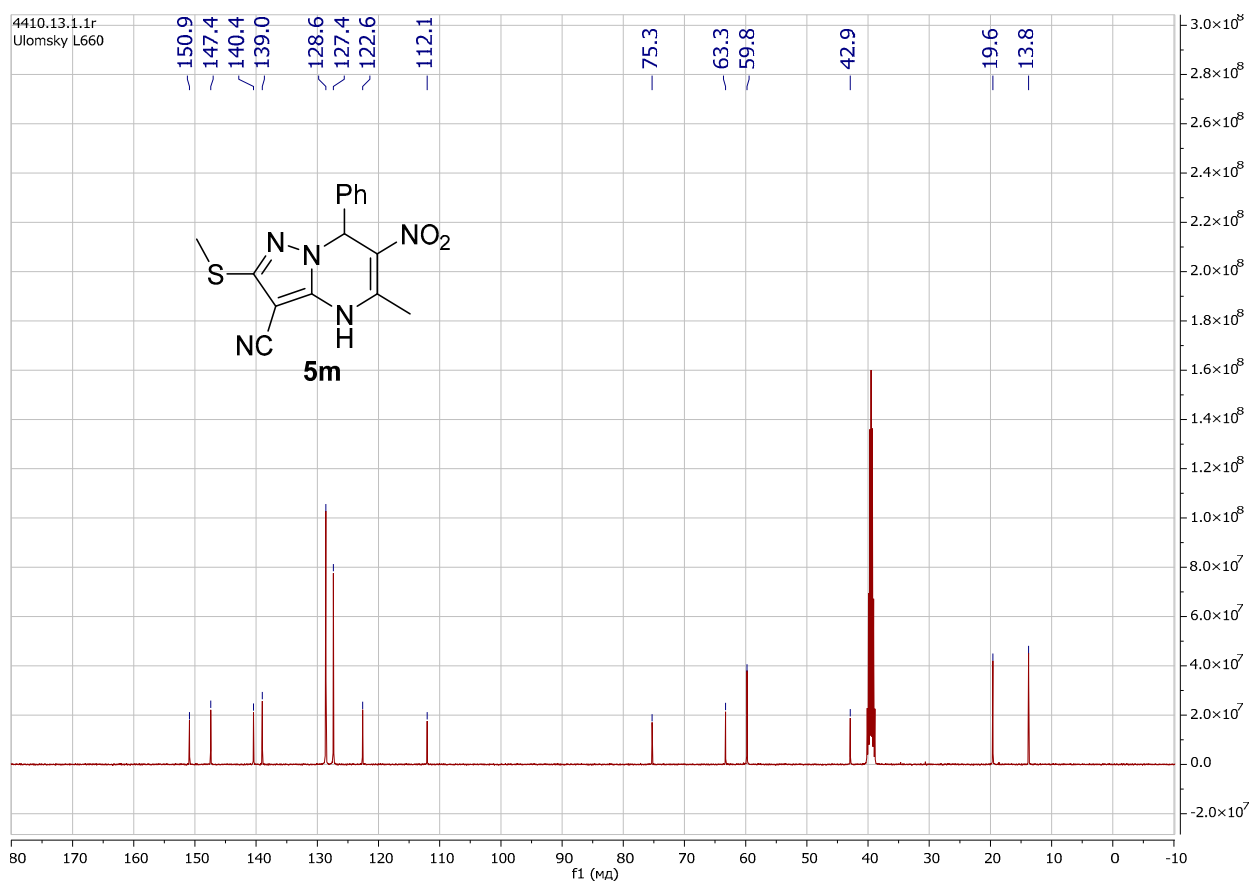

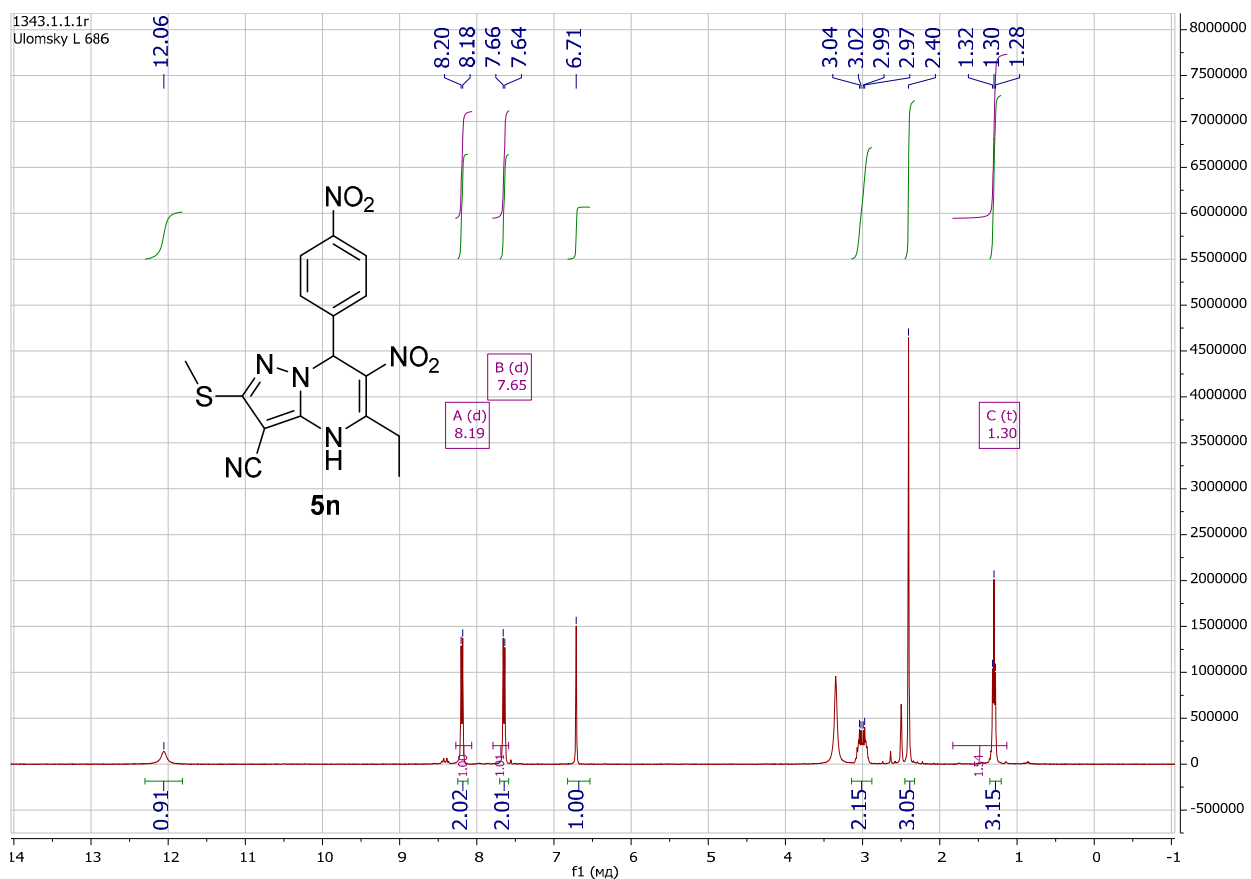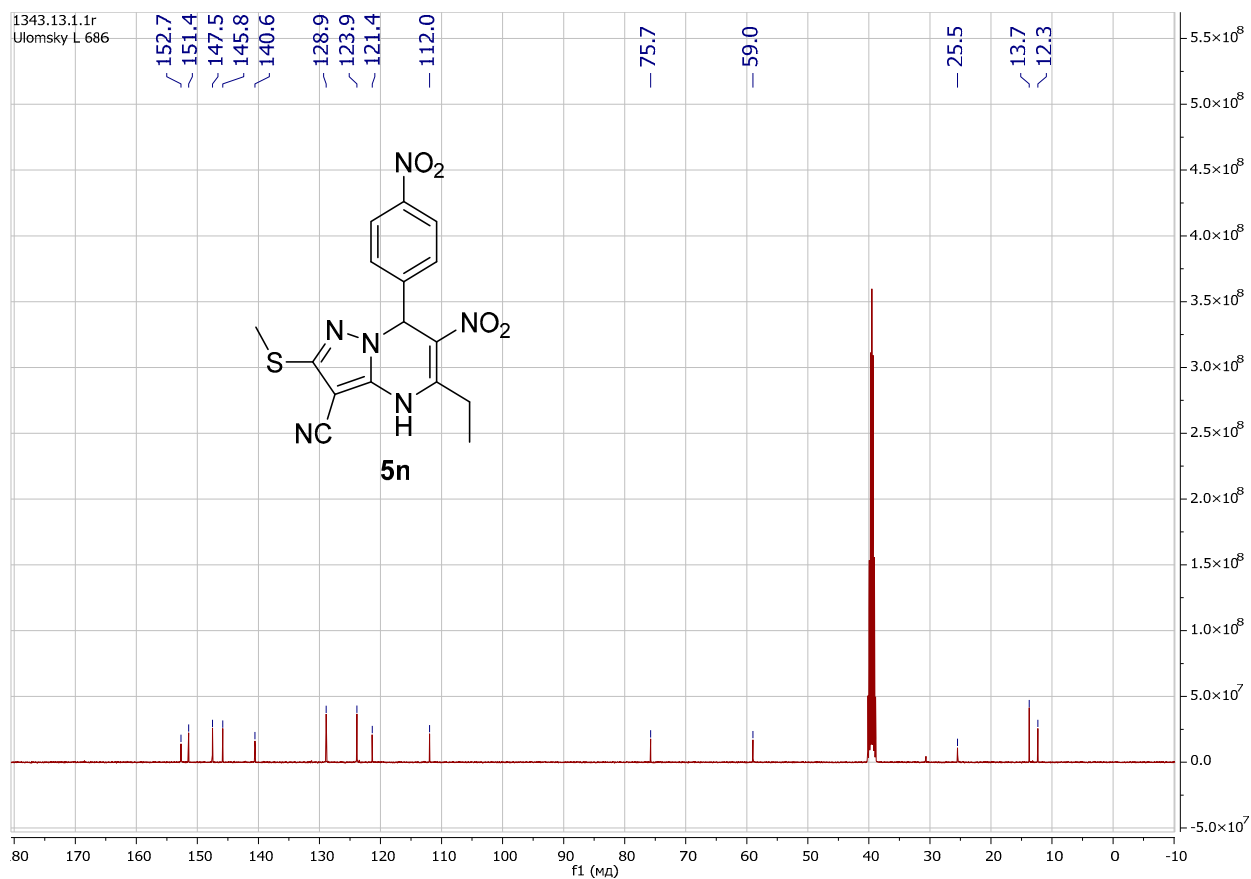

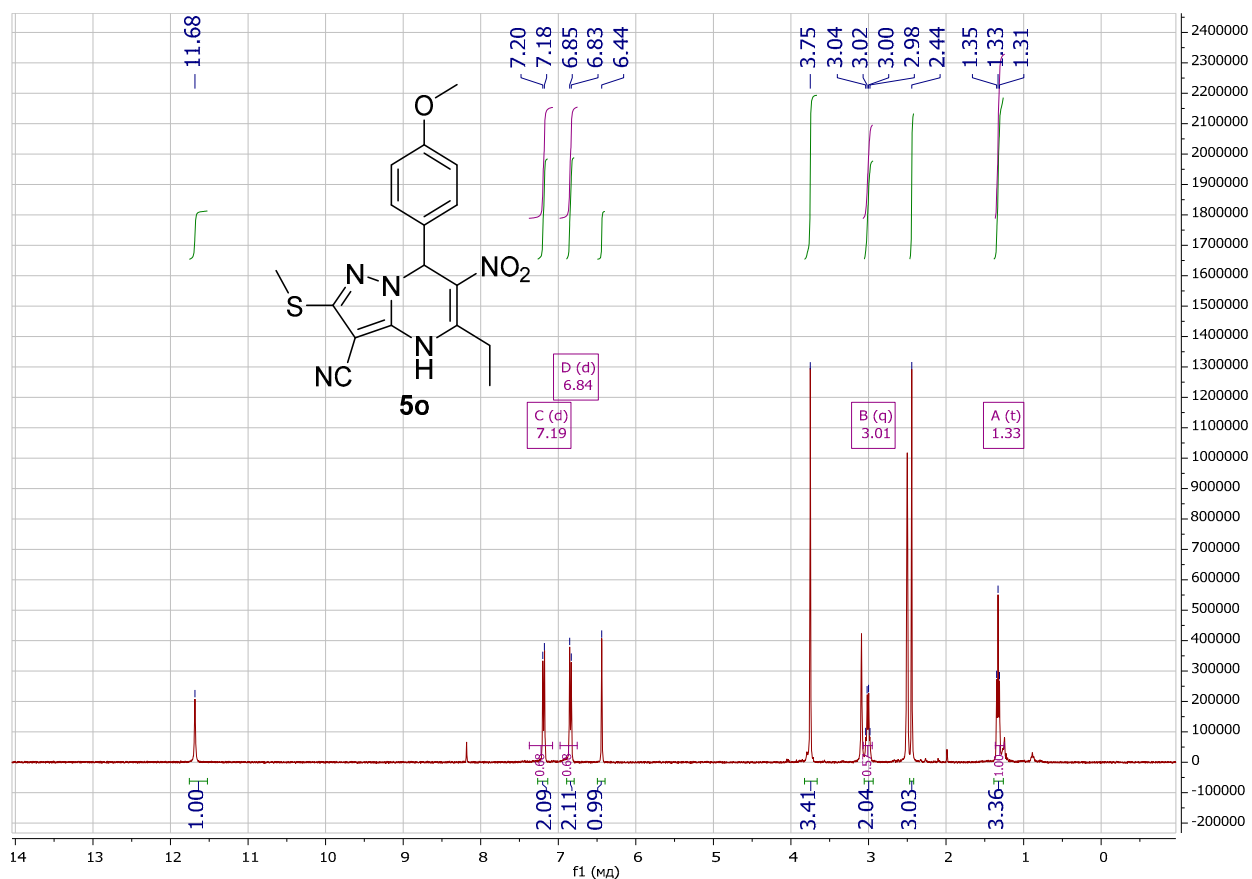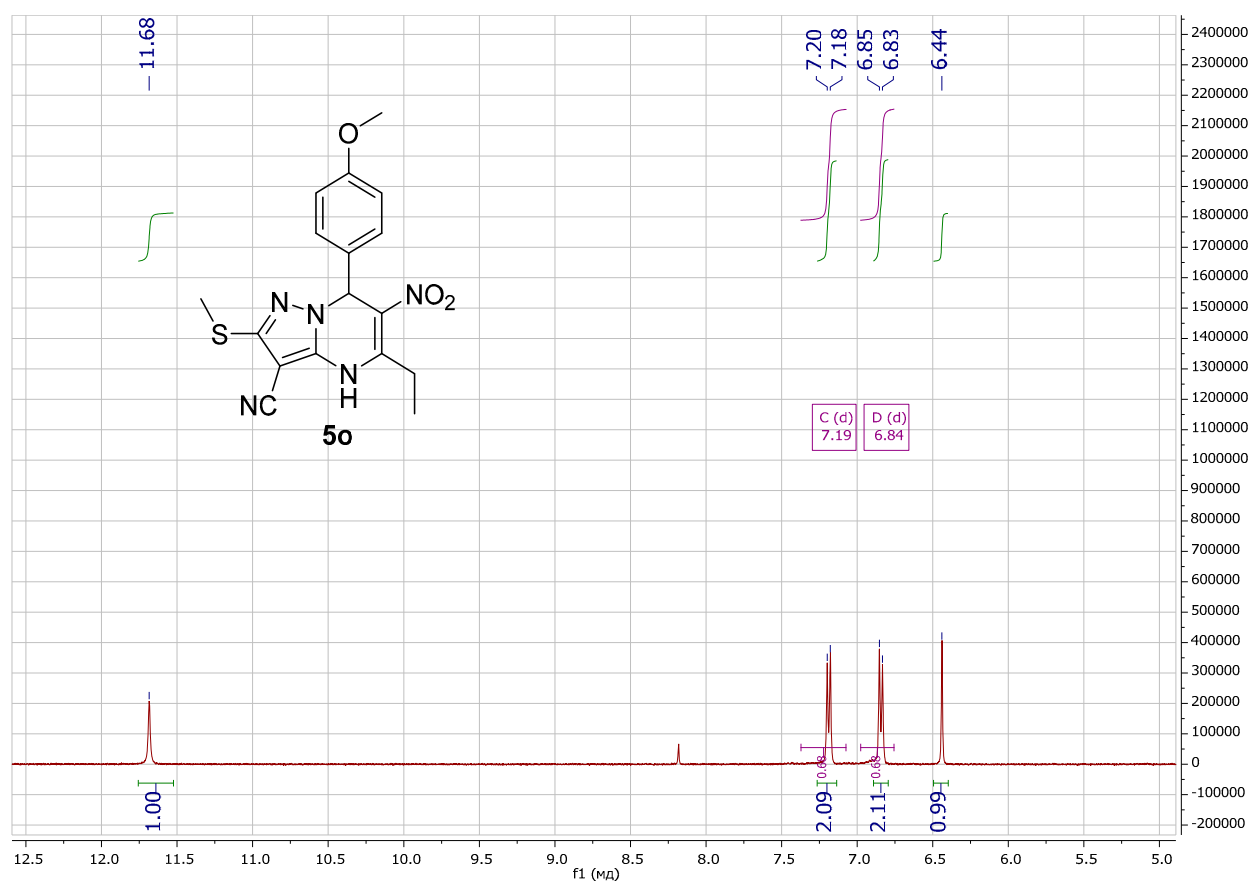



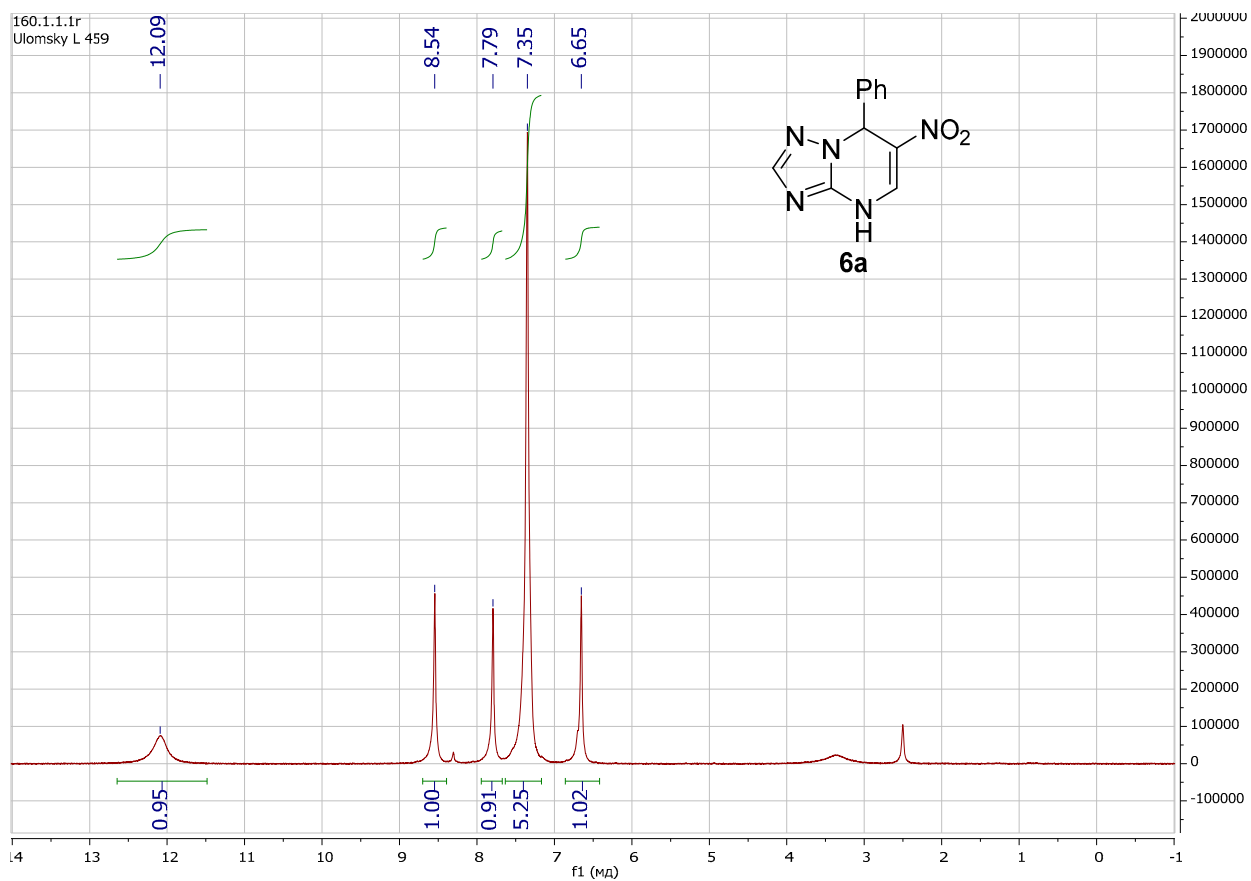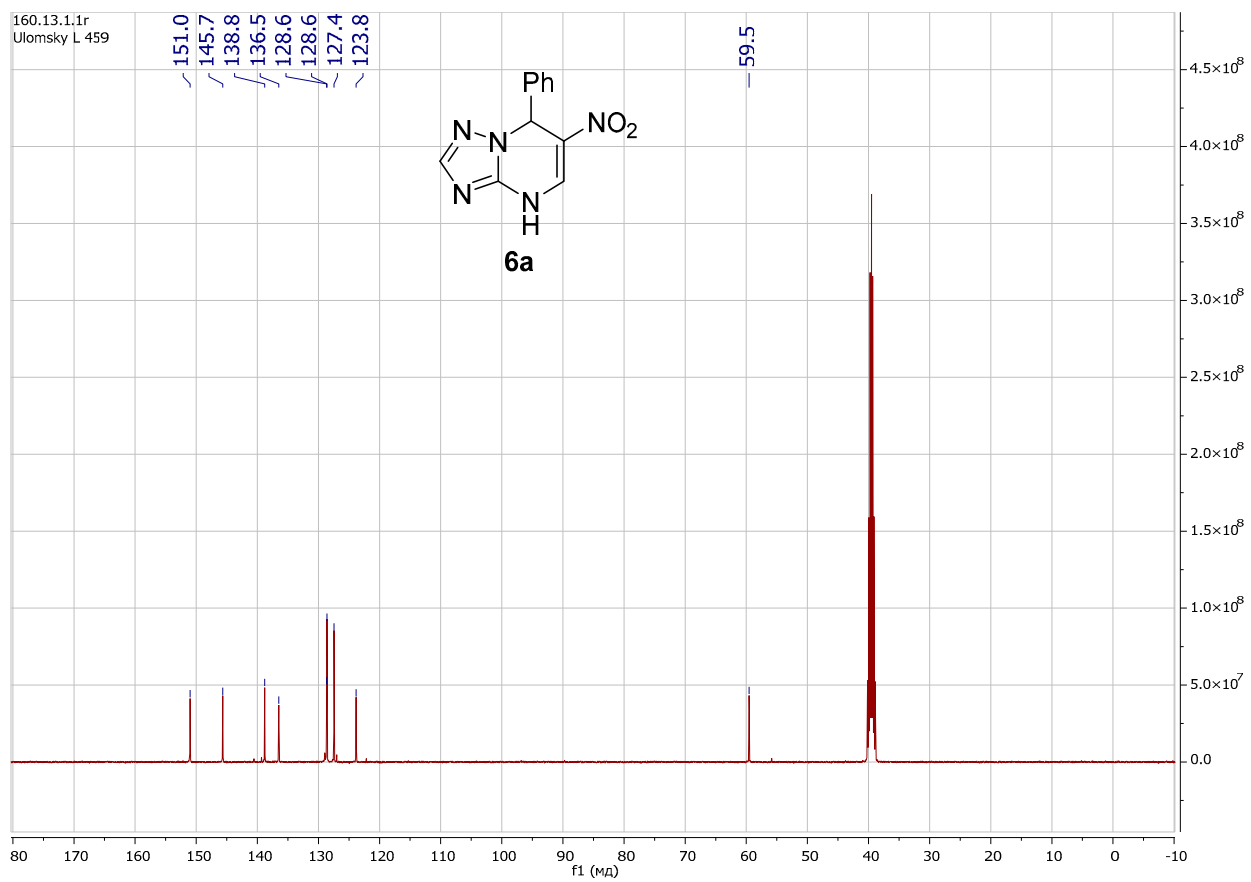

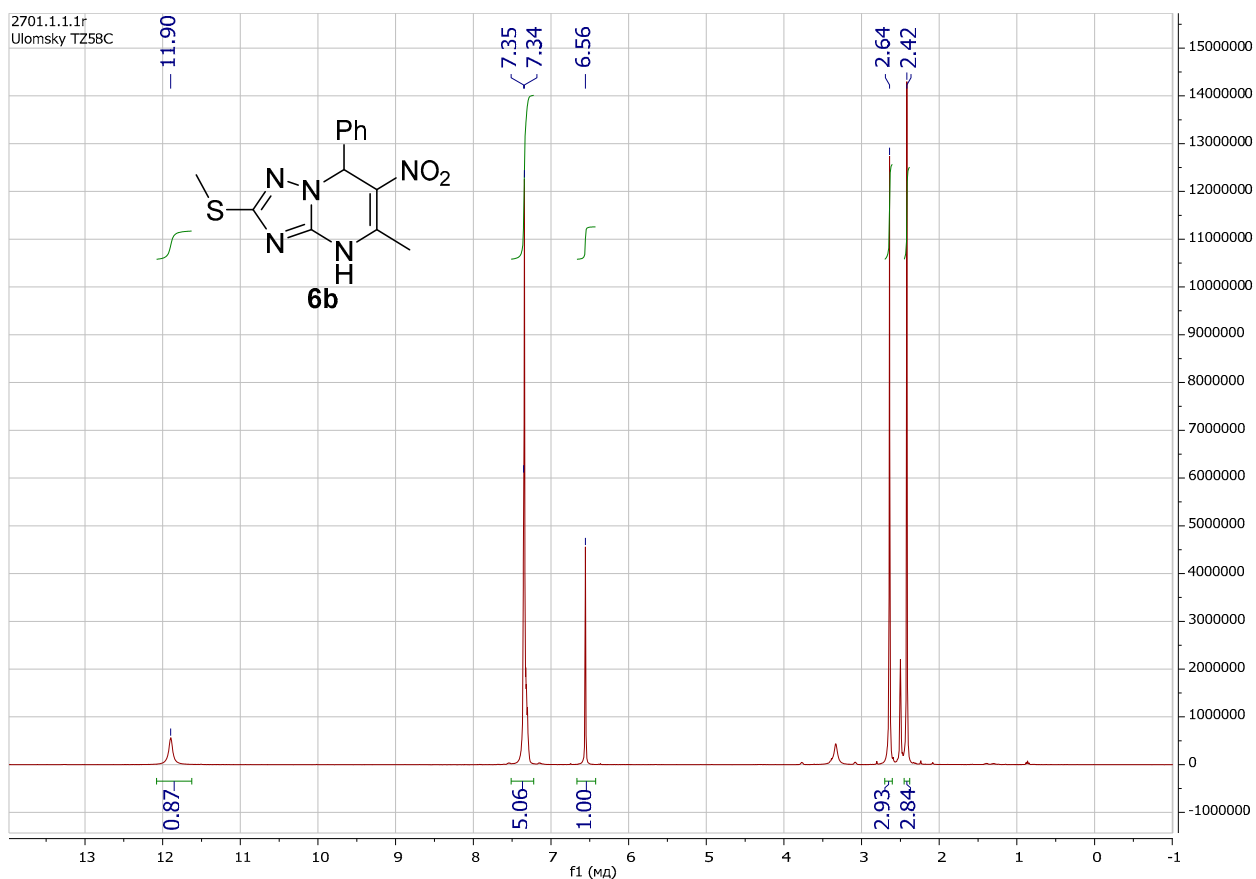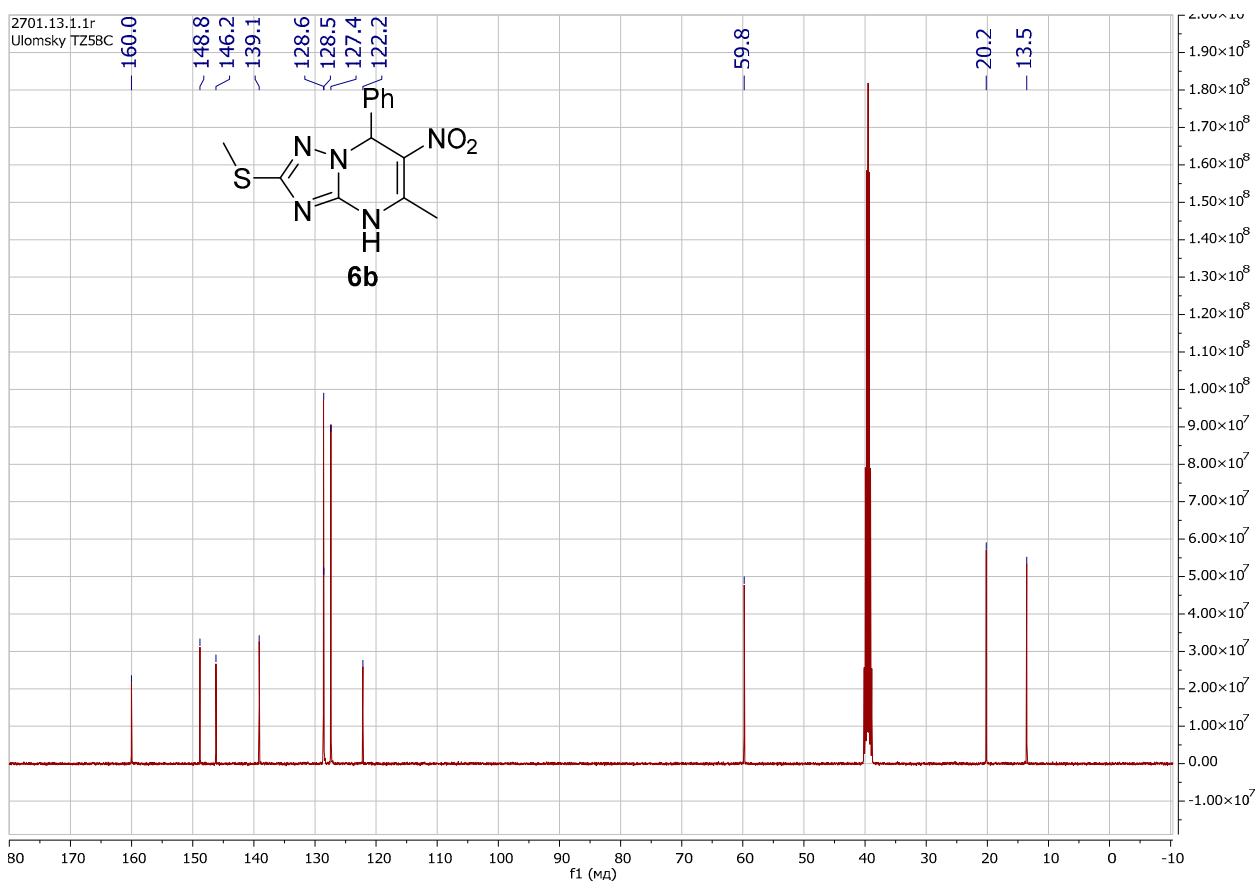



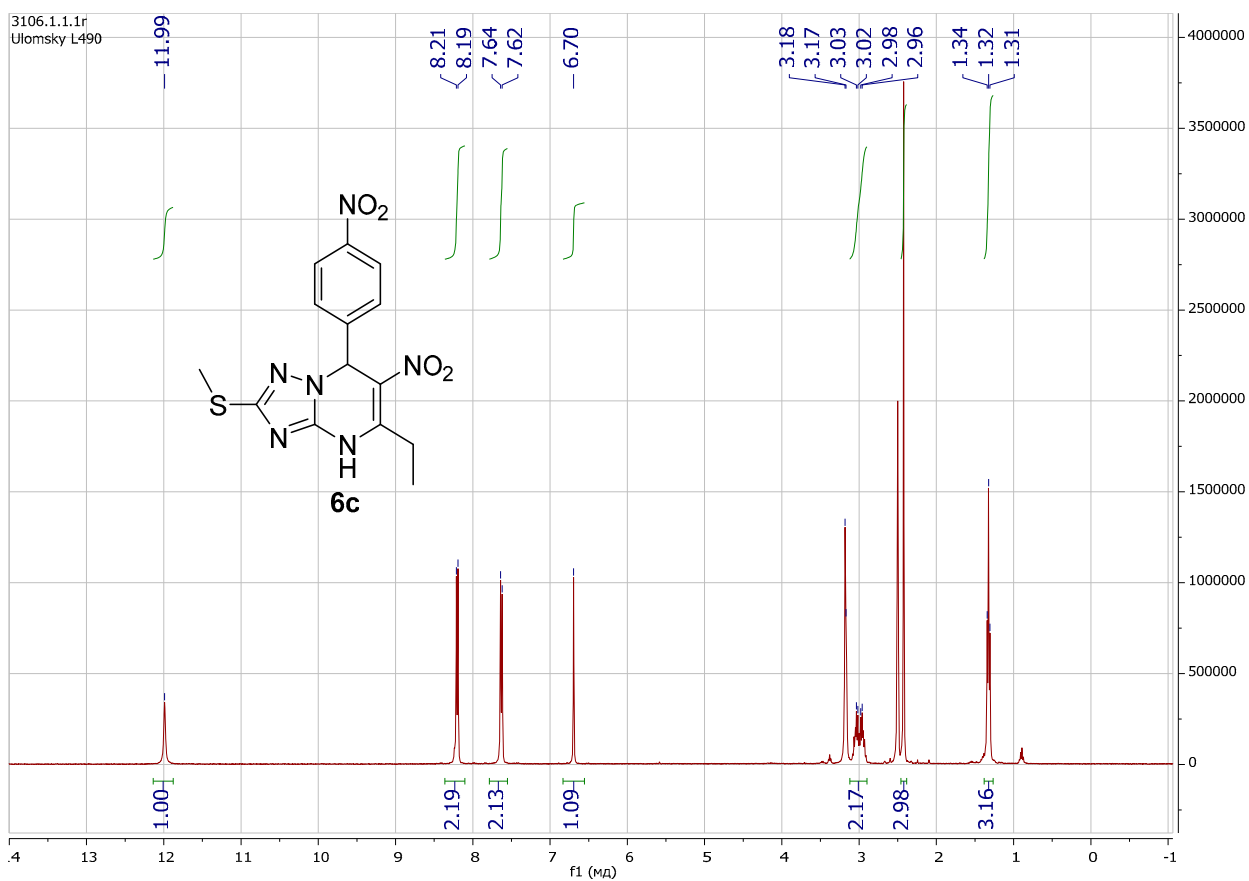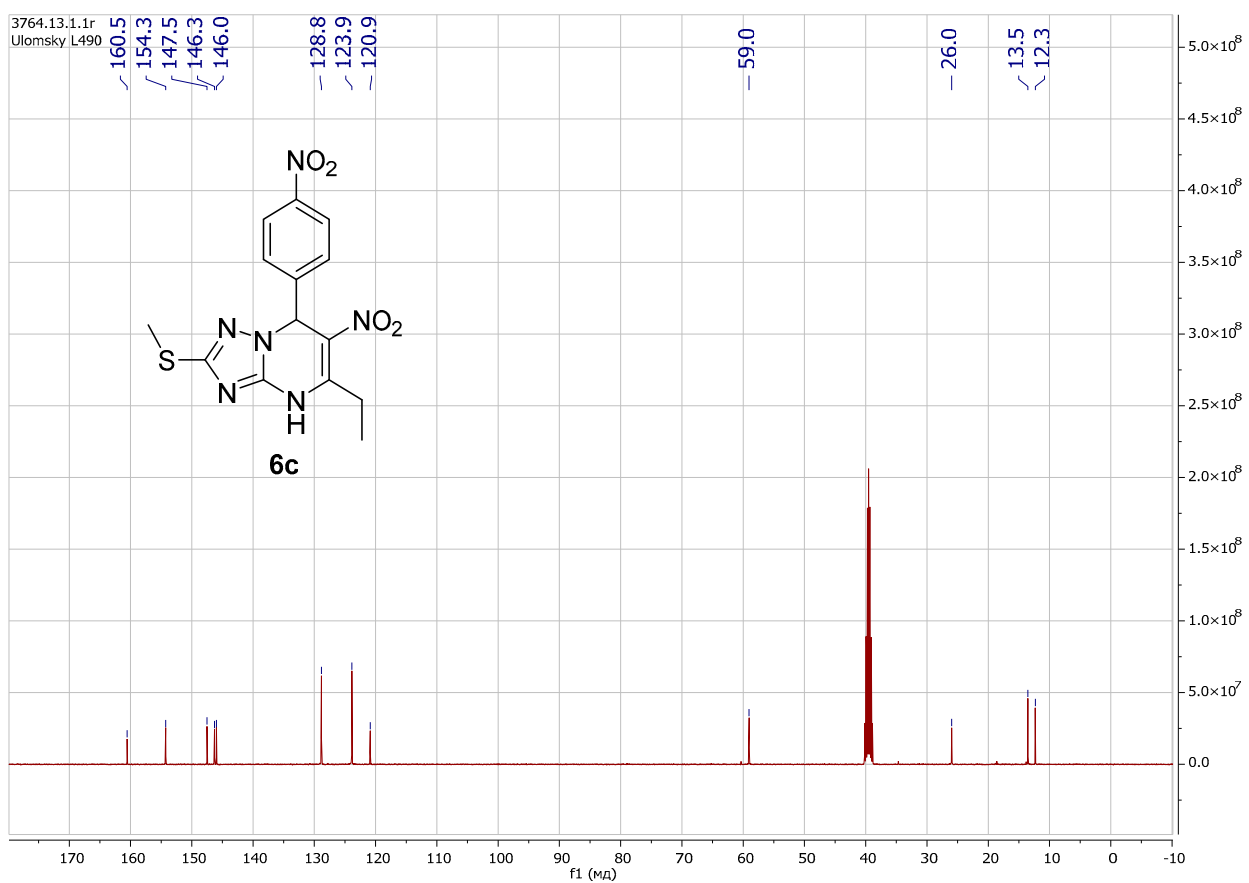



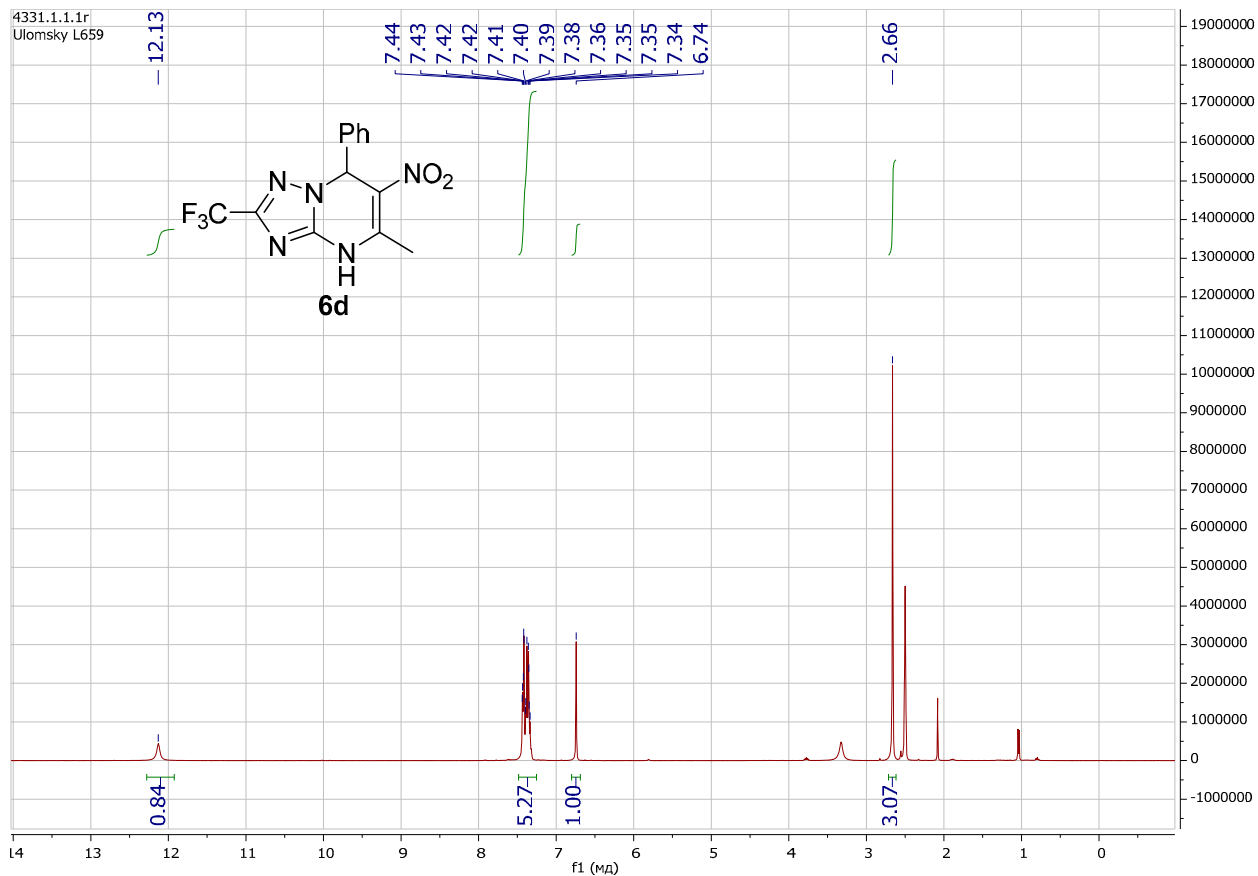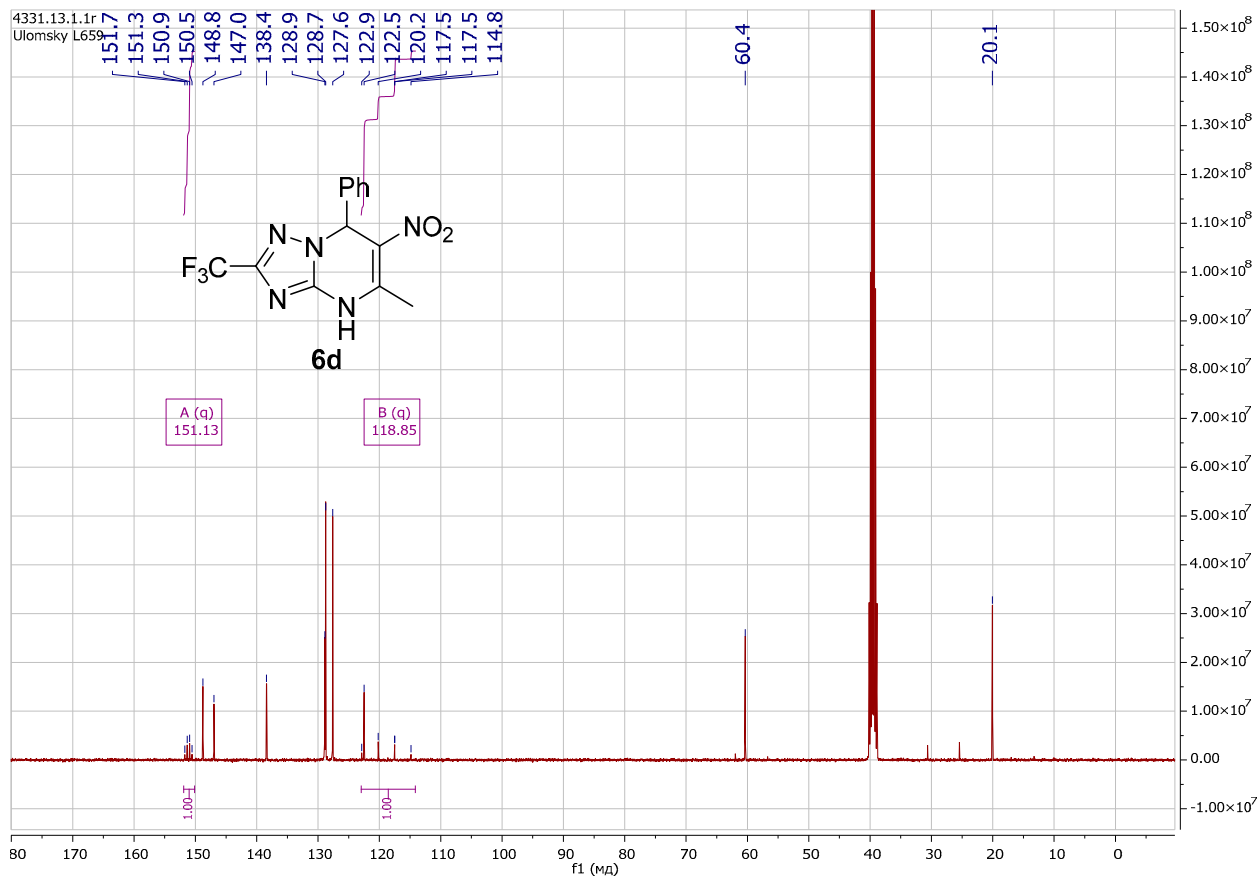



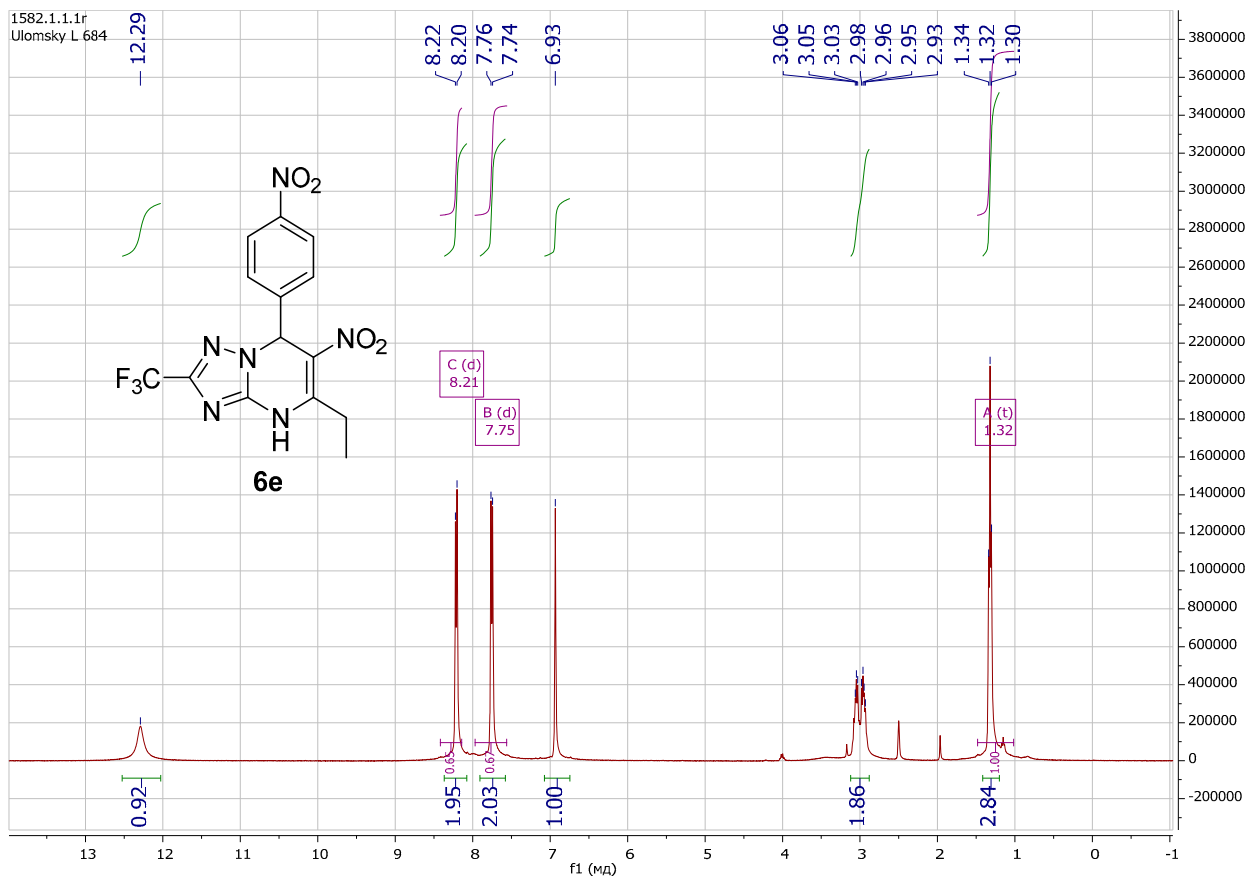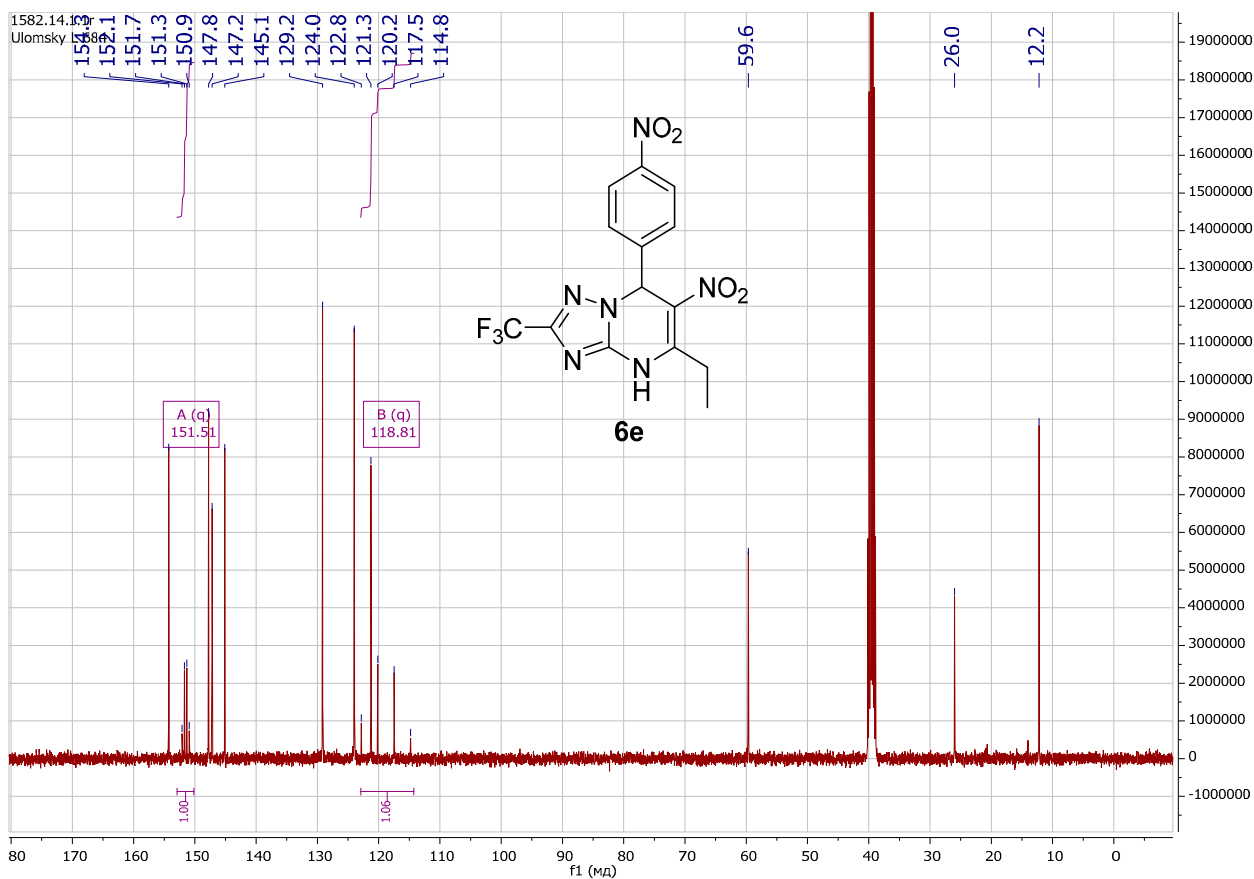

Supplement: s1 [file s1]
